# Supplementary material
Source: PubMed Central journal article supplement (PMC8315738)
Supplement: mcb00526-20_supp_1_seq10.pdf [file mcb00526-20_supp_1_seq10.pdf]

Supplemental Table S1: Rp58+/+ vs Rp58-/-

|          | Direction | log2FoldChar | pvalue    | padj      |
|----------|-----------|--------------|-----------|-----------|
| Lmcd1    | Down      | -8.059545    | 0         | 0         |
| Slc6a11  | Down      | -6.8301406   | 9.51E-196 | 2.41E-192 |
| Cilp     | Down      | -6.6545613   | 1.66E-115 | 1.05E-112 |
| BC034090 | Down      | -5.7095794   | 9.83E-161 | 1.94E-157 |
| Mmp2     | Down      | -5.5899157   | 1.05E-197 | 3.11E-194 |
| Gpr153   | Down      | -5.5719701   | 9.85E-146 | 1.75E-142 |
| Kcnh1    | Down      | -5.4871749   | 6.22E-82  | 2.08E-79  |
| Gpc3     | Down      | -5.434408    | 3.30E-71  | 8.73E-69  |
| Irs4     | Down      | -5.0797428   | 8.22E-55  | 1.46E-52  |
| Tril     | Down      | -5.0694093   | 1.43E-126 | 1.15E-123 |
| Gdf10    | Down      | -4.9946117   | 1.31E-143 | 1.78E-140 |
| Myo10    | Down      | -4.9640702   | 1.73E-89  | 6.84E-87  |
| Lfng     | Down      | -4.9097122   | 2.89E-58  | 5.89E-56  |
| Accn4    | Down      | -4.8539933   | 5.83E-43  | 6.76E-41  |
| Finc     | Down      | -4.8193094   | 1.62E-129 | 1.51E-126 |
| Gja1     | Down      | -4.8111807   | 5.97E-84  | 2.16E-81  |
| Notum    | Down      | -4.7513822   | 7.94E-45  | 1.01E-42  |
| Foxo1    | Down      | -4.7023688   | 3.55E-286 | 3.15E-282 |
| Nptx2    | Down      | -4.6779367   | 1.24E-66  | 3.02E-64  |
| Egfem1   | Down      | -4.6193585   | 2.97E-51  | 4.54E-49  |
| Drd5     | Down      | -4.5458788   | 9.24E-41  | 1.01E-38  |
| Met      | Down      | -4.5053176   | 4.21E-55  | 7.70E-53  |
| Zcchc12  | Down      | -4.4830706   | 3.51E-131 | 3.46E-128 |
| Fhl3     | Down      | -4.4517112   | 7.10E-54  | 1.22E-51  |
| Hrh3     | Down      | -4.4108415   | 1.24E-66  | 3.02E-64  |
| Rprml    | Down      | -4.2126457   | 7.57E-39  | 7.51E-37  |
| Fbln2    | Down      | -4.1952622   | 4.91E-33  | 3.91E-31  |
| Ppp1r17  | Down      | -4.1851568   | 3.51E-34  | 2.95E-32  |
| Gm9581   | Down      | -4.181018    | 1.52E-39  | 1.55E-37  |
| Col5a1   | Down      | -4.0506337   | 3.12E-141 | 3.69E-138 |
| Fst      | Down      | -4.0407557   | 1.64E-67  | 4.15E-65  |
| Hes1     | Down      | -3.876159    | 4.31E-39  | 4.33E-37  |
| Npr3     | Down      | -3.8470476   | 3.20E-36  | 2.91E-34  |
| Pde1c    | Down      | -3.8334854   | 2.78E-192 | 6.16E-189 |
| Syt17    | Down      | -3.8226071   | 3.70E-46  | 4.90E-44  |
| Cacng5   | Down      | -3.8025507   | 3.88E-38  | 3.70E-36  |
| Phlda1   | Down      | -3.7900162   | 4.00E-105 | 2.22E-102 |
| Tcerg1l  | Down      | -3.7222642   | 1.99E-51  | 3.10E-49  |
| Rasgef1c | Down      | -3.7023514   | 3.93E-40  | 4.17E-38  |

|             |      |            |           |           |
|-------------|------|------------|-----------|-----------|
| Tmem132e    | Down | -3.6931476 | 1.04E-33  | 8.54E-32  |
| Atoh8       | Down | -3.688932  | 5.78E-49  | 8.34E-47  |
| Synpr       | Down | -3.6804238 | 5.48E-56  | 1.02E-53  |
| D030025P21  | Down | -3.6452392 | 4.91E-24  | 2.60E-22  |
| Ramp1       | Down | -3.6329239 | 5.20E-34  | 4.33E-32  |
| Cacnb2      | Down | -3.5764146 | 4.48E-57  | 8.84E-55  |
| Greb1l      | Down | -3.5559321 | 1.54E-26  | 9.51E-25  |
| 6530418L21F | Down | -3.5054653 | 1.54E-115 | 1.01E-112 |
| Prox1       | Down | -3.5036899 | 5.44E-31  | 4.06E-29  |
| Dusp10      | Down | -3.4888101 | 6.42E-50  | 9.41E-48  |
| Cdh23       | Down | -3.4870234 | 1.27E-24  | 7.09E-23  |
| Rapgef3     | Down | -3.4729674 | 2.53E-36  | 2.32E-34  |
| Grin3a      | Down | -3.4625578 | 3.22E-30  | 2.33E-28  |
| Fam101b     | Down | -3.4557915 | 4.86E-25  | 2.79E-23  |
| Lamc2       | Down | -3.4529415 | 4.75E-65  | 1.11E-62  |
| Chsy3       | Down | -3.4154444 | 1.45E-39  | 1.49E-37  |
| Robo3       | Down | -3.3964546 | 2.20E-25  | 1.27E-23  |
| Grm4        | Down | -3.3647023 | 4.19E-27  | 2.69E-25  |
| Antxr2      | Down | -3.3334719 | 3.86E-38  | 3.70E-36  |
| Sema5b      | Down | -3.3316265 | 3.59E-115 | 2.20E-112 |
| Shroom2     | Down | -3.325228  | 1.68E-57  | 3.36E-55  |
| Kcnab1      | Down | -3.3234716 | 5.31E-20  | 2.31E-18  |
| Tnfaip8l3   | Down | -3.2455319 | 4.66E-23  | 2.32E-21  |
| Nr4a2       | Down | -3.2282361 | 1.95E-27  | 1.28E-25  |
| Kank2       | Down | -3.1874363 | 3.48E-24  | 1.87E-22  |
| A430110N23  | Down | -3.1808605 | 1.68E-20  | 7.48E-19  |
| Npy         | Down | -3.1749502 | 1.96E-18  | 7.82E-17  |
| Hspa2       | Down | -3.1446507 | 9.11E-34  | 7.55E-32  |
| Sv2b        | Down | -3.1331153 | 8.93E-52  | 1.40E-49  |
| Sorcs2      | Down | -3.1256328 | 6.11E-76  | 1.78E-73  |
| Pde7b       | Down | -3.1213495 | 2.10E-38  | 2.05E-36  |
| Cbln4       | Down | -3.109906  | 6.35E-18  | 2.45E-16  |
| Ildr2       | Down | -3.0821683 | 1.67E-73  | 4.71E-71  |
| Slc16a10    | Down | -3.0759953 | 1.19E-78  | 3.71E-76  |
| Sema5a      | Down | -3.0749886 | 4.16E-56  | 7.85E-54  |
| Crabp2      | Down | -3.0703728 | 3.38E-40  | 3.62E-38  |
| Htr3a       | Down | -3.0480441 | 1.10E-17  | 4.19E-16  |
| Mab21l2     | Down | -3.0236055 | 4.37E-20  | 1.91E-18  |
| Pou3f4      | Down | -3.01951   | 6.56E-44  | 8.03E-42  |
| Igdcc4      | Down | -3.018681  | 1.36E-63  | 3.10E-61  |
| Crhr1       | Down | -3.004089  | 7.38E-31  | 5.46E-29  |
| Zyx         | Down | -3.0038986 | 2.49E-222 | 8.82E-219 |

|            |      |            |           |           |
|------------|------|------------|-----------|-----------|
| Cpne2      | Down | -2.9821069 | 3.83E-36  | 3.47E-34  |
| Scn5a      | Down | -2.9788745 | 8.52E-24  | 4.42E-22  |
| Igfbp3     | Down | -2.9772896 | 3.78E-82  | 1.29E-79  |
| Lrtm2      | Down | -2.9771146 | 1.83E-27  | 1.21E-25  |
| AW551984   | Down | -2.973663  | 6.48E-22  | 3.06E-20  |
| Grasp      | Down | -2.9623983 | 1.22E-143 | 1.78E-140 |
| B3gnt9-ps  | Down | -2.9369665 | 8.08E-45  | 1.02E-42  |
| Fbln1      | Down | -2.9228066 | 1.35E-77  | 4.13E-75  |
| Insl6      | Down | -2.8936581 | 1.94E-17  | 7.34E-16  |
| Galr1      | Down | -2.8840725 | 1.44E-16  | 5.09E-15  |
| Slc2a13    | Down | -2.8830219 | 3.53E-124 | 2.61E-121 |
| Capn6      | Down | -2.8816453 | 2.71E-15  | 8.78E-14  |
| Ebf1       | Down | -2.8814435 | 3.40E-50  | 5.12E-48  |
| Zfp536     | Down | -2.8771553 | 3.35E-61  | 7.24E-59  |
| Htra1      | Down | -2.8628412 | 2.84E-27  | 1.83E-25  |
| Ak4        | Down | -2.8554555 | 9.37E-99  | 4.62E-96  |
| Cxxc4      | Down | -2.8549658 | 2.76E-73  | 7.64E-71  |
| Cbln2      | Down | -2.852701  | 2.71E-43  | 3.25E-41  |
| Cdhr1      | Down | -2.8375585 | 6.64E-16  | 2.25E-14  |
| Ascl1      | Down | -2.8140515 | 3.71E-52  | 5.93E-50  |
| Emilin1    | Down | -2.802278  | 1.63E-19  | 6.92E-18  |
| Sall1      | Down | -2.8011302 | 1.24E-24  | 6.93E-23  |
| Stard13    | Down | -2.7968499 | 6.86E-18  | 2.64E-16  |
| Slc6a1     | Down | -2.7936841 | 3.47E-56  | 6.62E-54  |
| Tacr3      | Down | -2.7874381 | 1.59E-29  | 1.13E-27  |
| Mylk       | Down | -2.7871388 | 4.20E-15  | 1.34E-13  |
| Mfng       | Down | -2.7757873 | 3.22E-44  | 3.97E-42  |
| Kitl       | Down | -2.7601149 | 6.47E-40  | 6.80E-38  |
| Six2       | Down | -2.7423913 | 2.86E-14  | 8.66E-13  |
| Timp3      | Down | -2.7365868 | 2.43E-53  | 4.10E-51  |
| Frmpd1     | Down | -2.7332296 | 5.63E-20  | 2.44E-18  |
| Ddit4l     | Down | -2.7228453 | 1.66E-15  | 5.44E-14  |
| Slc9a9     | Down | -2.7195053 | 3.30E-17  | 1.21E-15  |
| C1qtnf1    | Down | -2.7077203 | 8.36E-14  | 2.45E-12  |
| Megf10     | Down | -2.7071303 | 1.22E-46  | 1.63E-44  |
| Sypl2      | Down | -2.7007252 | 1.45E-19  | 6.15E-18  |
| 1810011O10 | Down | -2.6961766 | 4.70E-94  | 1.98E-91  |
| Tec        | Down | -2.694407  | 1.92E-18  | 7.70E-17  |
| Sash1      | Down | -2.6695899 | 5.46E-17  | 1.98E-15  |
| Chodl      | Down | -2.6681555 | 1.67E-18  | 6.73E-17  |
| Ppap2b     | Down | -2.664714  | 6.05E-55  | 1.09E-52  |
| Bmp2       | Down | -2.6588855 | 1.35E-18  | 5.50E-17  |

|            |      |            |          |          |
|------------|------|------------|----------|----------|
| Cables1    | Down | -2.6456695 | 1.67E-71 | 4.50E-69 |
| Crb1       | Down | -2.6423047 | 1.41E-20 | 6.31E-19 |
| Btbd17     | Down | -2.6389302 | 9.19E-34 | 7.58E-32 |
| Tekt1      | Down | -2.6370461 | 2.91E-62 | 6.54E-60 |
| Lrfn2      | Down | -2.6213837 | 3.93E-46 | 5.17E-44 |
| Tac1       | Down | -2.6057412 | 1.23E-13 | 3.54E-12 |
| Ets2       | Down | -2.5944858 | 2.11E-59 | 4.51E-57 |
| Stc1       | Down | -2.5923825 | 3.57E-33 | 2.87E-31 |
| Prkg1      | Down | -2.5874828 | 4.90E-13 | 1.35E-11 |
| Creb3l2    | Down | -2.5867868 | 1.64E-24 | 8.98E-23 |
| Angpt1     | Down | -2.5712505 | 9.34E-34 | 7.68E-32 |
| Vwc2l      | Down | -2.5649768 | 3.71E-14 | 1.12E-12 |
| Ptgfrn     | Down | -2.5419651 | 2.64E-37 | 2.49E-35 |
| Ttc6       | Down | -2.5297668 | 2.35E-12 | 6.12E-11 |
| Agtr2      | Down | -2.525535  | 3.20E-12 | 8.23E-11 |
| Snai1      | Down | -2.523376  | 3.56E-12 | 9.10E-11 |
| Ndufa4l2   | Down | -2.517881  | 6.79E-13 | 1.84E-11 |
| Stat5b     | Down | -2.5157742 | 3.53E-17 | 1.29E-15 |
| Gm17180    | Down | -2.5042575 | 4.63E-12 | 1.17E-10 |
| Fgd6       | Down | -2.5034579 | 1.96E-15 | 6.38E-14 |
| Chrna3     | Down | -2.490986  | 2.89E-19 | 1.21E-17 |
| Vwa2       | Down | -2.4865514 | 5.86E-12 | 1.46E-10 |
| Ppapdc1a   | Down | -2.4795407 | 3.32E-12 | 8.51E-11 |
| Dscaml1    | Down | -2.4711328 | 1.31E-34 | 1.13E-32 |
| Plagl1     | Down | -2.4596627 | 1.77E-83 | 6.29E-81 |
| Reps2      | Down | -2.4580792 | 4.66E-29 | 3.26E-27 |
| Crabp1     | Down | -2.4547066 | 1.80E-39 | 1.83E-37 |
| D4Bwg0951e | Down | -2.4494462 | 4.71E-43 | 5.54E-41 |
| Slc27a3    | Down | -2.4396696 | 3.21E-76 | 9.49E-74 |
| A330009N23 | Down | -2.4294321 | 9.44E-32 | 7.22E-30 |
| Lor        | Down | -2.4118317 | 2.29E-11 | 5.34E-10 |
| Smtnl2     | Down | -2.4097173 | 7.80E-18 | 2.98E-16 |
| Gabrg1     | Down | -2.3939818 | 2.21E-11 | 5.16E-10 |
| Onecut1    | Down | -2.391889  | 4.31E-11 | 9.76E-10 |
| Ntn4       | Down | -2.3852276 | 2.95E-23 | 1.48E-21 |
| Gm12371    | Down | -2.3837189 | 2.97E-11 | 6.80E-10 |
| Crybg3     | Down | -2.3601329 | 1.64E-13 | 4.64E-12 |
| Npas3      | Down | -2.3457823 | 6.87E-31 | 5.10E-29 |
| Eya1       | Down | -2.3387865 | 8.02E-16 | 2.72E-14 |
| Pon2       | Down | -2.3303982 | 2.72E-14 | 8.25E-13 |
| Fat1       | Down | -2.3205739 | 2.73E-27 | 1.77E-25 |
| Emid1      | Down | -2.3173722 | 2.15E-27 | 1.41E-25 |

|            |      |            |           |           |
|------------|------|------------|-----------|-----------|
| 6330527006 | Down | -2.3145293 | 6.08E-12  | 1.51E-10  |
| Gprin3     | Down | -2.3087602 | 1.78E-24  | 9.69E-23  |
| Il11ra1    | Down | -2.3081282 | 1.28E-16  | 4.55E-15  |
| Igsf21     | Down | -2.303701  | 3.03E-40  | 3.26E-38  |
| Pgm5       | Down | -2.3010952 | 2.29E-11  | 5.34E-10  |
| Dmrta2     | Down | -2.2923275 | 1.88E-34  | 1.60E-32  |
| Chrm5      | Down | -2.2921169 | 8.40E-11  | 1.84E-09  |
| Ppp1r3b    | Down | -2.2891815 | 1.03E-11  | 2.50E-10  |
| 4732444A12 | Down | -2.2857899 | 2.16E-10  | 4.57E-09  |
| Rtkn       | Down | -2.2806244 | 1.04E-11  | 2.54E-10  |
| Mest       | Down | -2.2801728 | 3.64E-119 | 2.58E-116 |
| Rasd1      | Down | -2.2597461 | 2.38E-10  | 5.00E-09  |
| Svil       | Down | -2.2542473 | 1.83E-10  | 3.92E-09  |
| Ctxn3      | Down | -2.2541313 | 6.53E-21  | 2.97E-19  |
| Ltbp2      | Down | -2.2473115 | 3.71E-10  | 7.63E-09  |
| Lingo2     | Down | -2.2417722 | 7.36E-37  | 6.91E-35  |
| Fgf18      | Down | -2.2398823 | 2.50E-34  | 2.11E-32  |
| Zfp941     | Down | -2.2330855 | 2.04E-21  | 9.42E-20  |
| Kcna5      | Down | -2.2256618 | 8.43E-10  | 1.68E-08  |
| Rell1      | Down | -2.224703  | 1.08E-39  | 1.11E-37  |
| Rorc       | Down | -2.2199423 | 8.97E-14  | 2.62E-12  |
| Tceal6     | Down | -2.2107318 | 2.40E-24  | 1.30E-22  |
| Neurod1    | Down | -2.2058248 | 1.98E-25  | 1.15E-23  |
| Cd97       | Down | -2.2039323 | 1.47E-12  | 3.90E-11  |
| Adamts1    | Down | -2.2018961 | 7.40E-24  | 3.86E-22  |
| Cntnap5b   | Down | -2.193301  | 3.37E-18  | 1.32E-16  |
| Arx        | Down | -2.174428  | 2.13E-10  | 4.52E-09  |
| Gfra1      | Down | -2.1665548 | 1.13E-26  | 7.05E-25  |
| Pcdh11x    | Down | -2.1642421 | 9.76E-12  | 2.38E-10  |
| Ssfa2      | Down | -2.1554028 | 2.18E-30  | 1.58E-28  |
| Adamts5    | Down | -2.1514067 | 8.71E-40  | 9.04E-38  |
| Tgfbr2     | Down | -2.1513346 | 6.11E-11  | 1.36E-09  |
| Klf15      | Down | -2.1466377 | 1.81E-16  | 6.38E-15  |
| Homer2     | Down | -2.1453401 | 2.21E-22  | 1.07E-20  |
| Grp        | Down | -2.1453361 | 5.40E-10  | 1.09E-08  |
| Mrc2       | Down | -2.1369123 | 3.50E-14  | 1.05E-12  |
| Cacna1g    | Down | -2.1310872 | 2.97E-31  | 2.24E-29  |
| Wscd1      | Down | -2.1267721 | 4.62E-24  | 2.45E-22  |
| Fam43a     | Down | -2.1260132 | 9.42E-16  | 3.16E-14  |
| Chd7       | Down | -2.1237213 | 7.28E-19  | 3.03E-17  |
| Tns3       | Down | -2.1217315 | 4.73E-18  | 1.85E-16  |
| Ajap1      | Down | -2.1210719 | 2.15E-22  | 1.04E-20  |

|           |      |            |          |          |
|-----------|------|------------|----------|----------|
| Bcan      | Down | -2.1119123 | 3.04E-11 | 6.93E-10 |
| Sstr1     | Down | -2.1052109 | 1.79E-11 | 4.22E-10 |
| Akna      | Down | -2.1021186 | 6.97E-17 | 2.51E-15 |
| Epb4.1l4a | Down | -2.101758  | 3.60E-26 | 2.19E-24 |
| Hrk       | Down | -2.0941519 | 1.92E-24 | 1.04E-22 |
| Chn2      | Down | -2.0747142 | 4.07E-73 | 1.11E-70 |
| Pappa     | Down | -2.0736806 | 1.07E-09 | 2.10E-08 |
| Adcyap1r1 | Down | -2.0699507 | 8.92E-83 | 3.10E-80 |
| Ntrk1     | Down | -2.0694717 | 3.67E-10 | 7.55E-09 |
| Ng23      | Down | -2.0655855 | 8.32E-16 | 2.81E-14 |
| Serpinh1  | Down | -2.0646399 | 2.84E-66 | 6.82E-64 |
| Frmpd3    | Down | -2.0636194 | 1.48E-09 | 2.89E-08 |
| Phactr2   | Down | -2.0601021 | 1.30E-19 | 5.55E-18 |
| Lcp2      | Down | -2.0546401 | 1.69E-08 | 2.95E-07 |
| Hs6st3    | Down | -2.0541904 | 2.65E-09 | 5.05E-08 |
| Slc4a4    | Down | -2.0536842 | 1.46E-12 | 3.87E-11 |
| Vav3      | Down | -2.0450406 | 3.83E-17 | 1.40E-15 |
| Pou4f1    | Down | -2.0386444 | 8.54E-10 | 1.70E-08 |
| Spon1     | Down | -2.0374378 | 2.16E-10 | 4.57E-09 |
| Adamts7   | Down | -2.035661  | 1.95E-22 | 9.50E-21 |
| Neurl1a   | Down | -2.0294499 | 1.06E-23 | 5.47E-22 |
| Kif4      | Down | -2.0144324 | 7.74E-14 | 2.28E-12 |
| Loxl1     | Down | -2.0102743 | 7.74E-11 | 1.70E-09 |
| Gucy1b2   | Down | -2.0094339 | 1.91E-09 | 3.69E-08 |
| Utrn      | Down | -2.0062673 | 2.14E-17 | 8.05E-16 |
| Igfbp4    | Down | -1.9997    | 4.73E-67 | 1.18E-64 |
| Sln       | Down | -1.9988169 | 2.58E-20 | 1.14E-18 |
| Csmd2     | Down | -1.9982807 | 7.65E-14 | 2.25E-12 |
| Dock10    | Down | -1.9981419 | 3.88E-08 | 6.46E-07 |
| 1-Mar     | Down | -1.9945806 | 8.24E-41 | 9.20E-39 |
| Nqo1      | Down | -1.993027  | 1.10E-08 | 1.97E-07 |
| Gm6264    | Down | -1.9862563 | 6.35E-10 | 1.28E-08 |
| Dhrs7     | Down | -1.9857019 | 9.07E-16 | 3.05E-14 |
| CK137956  | Down | -1.9791227 | 2.65E-08 | 4.50E-07 |
| Cdc6      | Down | -1.9771726 | 1.37E-11 | 3.28E-10 |
| Inpp1     | Down | -1.9758473 | 4.07E-43 | 4.84E-41 |
| Gpr88     | Down | -1.9723358 | 9.20E-09 | 1.65E-07 |
| Stk33     | Down | -1.9666613 | 4.37E-12 | 1.11E-10 |
| Spock2    | Down | -1.9632799 | 1.54E-53 | 2.62E-51 |
| Depdc7    | Down | -1.9622799 | 6.40E-09 | 1.17E-07 |
| Wwtr1     | Down | -1.9612994 | 6.32E-09 | 1.16E-07 |
| Col4a1    | Down | -1.9603929 | 9.05E-12 | 2.22E-10 |

|             |      |            |          |          |
|-------------|------|------------|----------|----------|
| Kcnd3       | Down | -1.9506608 | 8.70E-49 | 1.24E-46 |
| Galnt16     | Down | -1.9492427 | 2.41E-08 | 4.12E-07 |
| Cacng3      | Down | -1.9469115 | 2.49E-08 | 4.25E-07 |
| Rwdd3       | Down | -1.9419355 | 8.20E-19 | 3.39E-17 |
| Mfap4       | Down | -1.9388916 | 1.10E-24 | 6.15E-23 |
| Dkk2        | Down | -1.93755   | 8.80E-09 | 1.59E-07 |
| Sertad4     | Down | -1.9327869 | 1.64E-30 | 1.20E-28 |
| Lrrc10b     | Down | -1.9322222 | 8.64E-08 | 1.38E-06 |
| Kcnip1      | Down | -1.9285694 | 3.72E-26 | 2.25E-24 |
| Sox2        | Down | -1.9260161 | 1.10E-11 | 2.65E-10 |
| Ccnf        | Down | -1.9167372 | 2.15E-33 | 1.74E-31 |
| Rcn1        | Down | -1.9138723 | 2.12E-08 | 3.65E-07 |
| Slc43a1     | Down | -1.9096108 | 1.45E-18 | 5.86E-17 |
| B430305J03F | Down | -1.9068956 | 1.55E-08 | 2.73E-07 |
| Grik2       | Down | -1.9067875 | 7.58E-50 | 1.10E-47 |
| 6-Sep       | Down | -1.9063298 | 1.49E-21 | 6.94E-20 |
| Zfp36l1     | Down | -1.9019591 | 1.56E-07 | 2.42E-06 |
| Kif19a      | Down | -1.8981225 | 1.87E-09 | 3.61E-08 |
| Pitpnm3     | Down | -1.8977171 | 1.07E-11 | 2.60E-10 |
| Myo18b      | Down | -1.8950017 | 2.02E-11 | 4.74E-10 |
| Mdfi        | Down | -1.8927241 | 3.90E-15 | 1.25E-13 |
| Hspa12b     | Down | -1.8908623 | 2.27E-09 | 4.34E-08 |
| Gm16766     | Down | -1.8829512 | 6.21E-08 | 1.01E-06 |
| Col14a1     | Down | -1.8772568 | 2.12E-07 | 3.20E-06 |
| Ston2       | Down | -1.8706631 | 1.15E-14 | 3.61E-13 |
| Grik1       | Down | -1.8667683 | 2.72E-07 | 4.06E-06 |
| Bcl2l11     | Down | -1.8667354 | 2.59E-17 | 9.64E-16 |
| E130308A19I | Down | -1.8662374 | 1.40E-19 | 5.95E-18 |
| Neurog2     | Down | -1.8656314 | 4.99E-25 | 2.86E-23 |
| Fam5b       | Down | -1.8601864 | 4.95E-55 | 8.96E-53 |
| Atp10d      | Down | -1.8568442 | 8.82E-10 | 1.75E-08 |
| Prss12      | Down | -1.8547292 | 3.60E-08 | 6.01E-07 |
| Cpne5       | Down | -1.853541  | 2.21E-16 | 7.75E-15 |
| 6030419C18I | Down | -1.8457605 | 2.73E-79 | 8.67E-77 |
| Sema3e      | Down | -1.8398218 | 5.85E-09 | 1.08E-07 |
| Pax6        | Down | -1.8365624 | 6.73E-13 | 1.83E-11 |
| Pdpn        | Down | -1.8344116 | 2.50E-07 | 3.74E-06 |
| Ptgis       | Down | -1.8314627 | 4.64E-07 | 6.65E-06 |
| Tmcc3       | Down | -1.8259488 | 1.85E-10 | 3.95E-09 |
| Nod1        | Down | -1.8228396 | 2.89E-10 | 6.04E-09 |
| Nhs         | Down | -1.8197983 | 5.84E-07 | 8.27E-06 |
| Snx8        | Down | -1.817653  | 4.81E-22 | 2.28E-20 |

|          |      |            |          |          |
|----------|------|------------|----------|----------|
| Bmp7     | Down | -1.8125514 | 1.68E-22 | 8.20E-21 |
| Maml3    | Down | -1.8080164 | 1.09E-30 | 8.02E-29 |
| Fzd4     | Down | -1.8070873 | 2.28E-08 | 3.91E-07 |
| Eln      | Down | -1.802415  | 7.32E-11 | 1.61E-09 |
| Card10   | Down | -1.800464  | 1.93E-07 | 2.95E-06 |
| Brca1    | Down | -1.7992316 | 9.60E-26 | 5.66E-24 |
| Dach1    | Down | -1.7890903 | 7.51E-26 | 4.47E-24 |
| Zcchc24  | Down | -1.7737767 | 1.07E-06 | 1.45E-05 |
| Neto1    | Down | -1.7736105 | 5.84E-07 | 8.27E-06 |
| Cntn5    | Down | -1.7678063 | 5.70E-09 | 1.06E-07 |
| Bmper    | Down | -1.7662674 | 2.37E-09 | 4.52E-08 |
| Cebpd    | Down | -1.7586964 | 5.18E-07 | 7.37E-06 |
| Map3k1   | Down | -1.7550534 | 1.61E-14 | 4.99E-13 |
| Dstyk    | Down | -1.7542881 | 1.25E-25 | 7.35E-24 |
| Il17d    | Down | -1.7533302 | 5.32E-28 | 3.61E-26 |
| Sstr4    | Down | -1.753178  | 1.24E-06 | 1.66E-05 |
| Tshr     | Down | -1.7444936 | 1.52E-06 | 2.01E-05 |
| Arap2    | Down | -1.7406304 | 1.55E-06 | 2.05E-05 |
| Sec16b   | Down | -1.7374717 | 1.88E-06 | 2.43E-05 |
| Mical2   | Down | -1.7360081 | 2.72E-13 | 7.65E-12 |
| Micalcl  | Down | -1.7340265 | 3.38E-08 | 5.67E-07 |
| Notch1   | Down | -1.729463  | 3.42E-07 | 5.00E-06 |
| Klhl3    | Down | -1.7286455 | 6.26E-41 | 7.03E-39 |
| Tmem132c | Down | -1.726541  | 3.03E-15 | 9.80E-14 |
| Cntn6    | Down | -1.7235194 | 1.58E-06 | 2.09E-05 |
| Syt13    | Down | -1.7230734 | 1.56E-09 | 3.04E-08 |
| Gspt2    | Down | -1.7212033 | 3.59E-21 | 1.64E-19 |
| Adamtsl2 | Down | -1.7202983 | 8.95E-07 | 1.24E-05 |
| Ggta1    | Down | -1.7199028 | 2.14E-08 | 3.69E-07 |
| Thsd7b   | Down | -1.7190556 | 3.53E-19 | 1.48E-17 |
| Ampd3    | Down | -1.7146479 | 1.75E-06 | 2.28E-05 |
| Enpp3    | Down | -1.7132679 | 2.43E-06 | 3.08E-05 |
| Itga8    | Down | -1.7116167 | 9.19E-09 | 1.65E-07 |
| Col9a2   | Down | -1.7100174 | 3.24E-15 | 1.04E-13 |
| Dusp26   | Down | -1.7094236 | 5.34E-21 | 2.43E-19 |
| Celf4    | Down | -1.7075791 | 1.57E-32 | 1.23E-30 |
| Rln1     | Down | -1.7027808 | 1.13E-08 | 2.02E-07 |
| Kif26b   | Down | -1.7023044 | 1.60E-06 | 2.10E-05 |
| Lhfpl2   | Down | -1.6940439 | 5.22E-16 | 1.78E-14 |
| Fam163a  | Down | -1.6927361 | 4.80E-10 | 9.74E-09 |
| Col4a5   | Down | -1.6820327 | 1.03E-06 | 1.41E-05 |
| Nxph4    | Down | -1.6776289 | 9.50E-26 | 5.62E-24 |



|            |      |            |          |          |
|------------|------|------------|----------|----------|
| Nfatc2     | Down | -1.6762002 | 3.41E-10 | 7.04E-09 |
| Plxnc1     | Down | -1.6729067 | 1.09E-28 | 7.52E-27 |
| Slc1a6     | Down | -1.6659651 | 5.85E-12 | 1.46E-10 |
| Ksr1       | Down | -1.6646066 | 2.78E-29 | 1.96E-27 |
| Dock9      | Down | -1.6633469 | 1.05E-44 | 1.31E-42 |
| Sox6       | Down | -1.6623455 | 1.25E-09 | 2.45E-08 |
| Kazald1    | Down | -1.6605707 | 1.61E-06 | 2.11E-05 |
| Rmst       | Down | -1.6583124 | 5.92E-13 | 1.62E-11 |
| Dock11     | Down | -1.6546712 | 2.20E-28 | 1.50E-26 |
| Bhlhe41    | Down | -1.6534634 | 1.90E-07 | 2.90E-06 |
| Cerkl      | Down | -1.652599  | 3.44E-08 | 5.77E-07 |
| Ptpru      | Down | -1.6510603 | 6.94E-22 | 3.27E-20 |
| Magi1      | Down | -1.6497671 | 1.76E-19 | 7.42E-18 |
| Caskin1    | Down | -1.642411  | 6.13E-24 | 3.22E-22 |
| Ugt8a      | Down | -1.6421715 | 2.10E-10 | 4.46E-09 |
| Nrp2       | Down | -1.641179  | 1.68E-15 | 5.50E-14 |
| Galntl2    | Down | -1.6367767 | 1.06E-19 | 4.54E-18 |
| Zfp219     | Down | -1.6359019 | 1.55E-27 | 1.03E-25 |
| Tll1       | Down | -1.6314295 | 5.14E-11 | 1.15E-09 |
| Necab1     | Down | -1.6275099 | 9.65E-11 | 2.10E-09 |
| Tmeff2     | Down | -1.6237178 | 1.86E-14 | 5.73E-13 |
| Tshz1      | Down | -1.6220364 | 8.55E-14 | 2.50E-12 |
| Plch1      | Down | -1.6220144 | 1.53E-13 | 4.35E-12 |
| Kctd16     | Down | -1.6209834 | 7.24E-06 | 8.44E-05 |
| Dmd        | Down | -1.6200692 | 1.53E-14 | 4.76E-13 |
| Klf12      | Down | -1.6198207 | 2.82E-47 | 3.85E-45 |
| Gm16625    | Down | -1.6182364 | 2.10E-07 | 3.19E-06 |
| Ltbp4      | Down | -1.6170181 | 5.26E-13 | 1.44E-11 |
| Itga4      | Down | -1.6153534 | 2.22E-12 | 5.80E-11 |
| Ebf4       | Down | -1.6039507 | 4.14E-24 | 2.21E-22 |
| Plxdc2     | Down | -1.6030626 | 3.02E-08 | 5.08E-07 |
| C130039O16 | Down | -1.6016862 | 6.73E-17 | 2.43E-15 |
| Efhd2      | Down | -1.5970774 | 1.50E-16 | 5.30E-15 |
| Pgm1       | Down | -1.5964146 | 3.53E-38 | 3.41E-36 |
| Dlgap2     | Down | -1.5938032 | 7.76E-10 | 1.55E-08 |
| Tnfsf11    | Down | -1.5890187 | 2.20E-06 | 2.81E-05 |
| Thbd       | Down | -1.5885582 | 6.46E-06 | 7.60E-05 |
| Phka1      | Down | -1.584858  | 6.91E-11 | 1.53E-09 |
| Mylip      | Down | -1.5824589 | 1.37E-07 | 2.14E-06 |
| Il17ra     | Down | -1.5818235 | 3.56E-29 | 2.50E-27 |
| Tln2       | Down | -1.5792421 | 6.30E-38 | 5.98E-36 |
| Dlgap1     | Down | -1.5763002 | 1.64E-24 | 9.00E-23 |

|            |      |            |           |            |
|------------|------|------------|-----------|------------|
| Islr       | Down | -1.575893  | 3.71E-10  | 7.63E-09   |
| Fam83f     | Down | -1.5729406 | 9.39E-06  | 0.00010774 |
| Lama5      | Down | -1.5671228 | 3.23E-06  | 4.02E-05   |
| Egfr       | Down | -1.5653221 | 7.20E-07  | 1.00E-05   |
| Olfml2b    | Down | -1.5653079 | 5.30E-39  | 5.28E-37   |
| Mmp14      | Down | -1.5650115 | 4.35E-30  | 3.13E-28   |
| Fam174a    | Down | -1.5643612 | 5.63E-09  | 1.04E-07   |
| Adamts10   | Down | -1.5572083 | 4.35E-09  | 8.14E-08   |
| Fam167a    | Down | -1.5520629 | 1.39E-10  | 3.01E-09   |
| Camk2d     | Down | -1.5490993 | 9.35E-07  | 1.29E-05   |
| Calb2      | Down | -1.5438486 | 1.74E-07  | 2.68E-06   |
| Kcnt1      | Down | -1.5382766 | 1.31E-06  | 1.75E-05   |
| Gm15383    | Down | -1.5332686 | 1.38E-05  | 0.0001529  |
| Chst3      | Down | -1.5327093 | 1.56E-05  | 0.00017153 |
| Gm8378     | Down | -1.5292926 | 1.05E-05  | 0.0001187  |
| Col12a1    | Down | -1.5266412 | 1.84E-05  | 0.00019881 |
| Ptn        | Down | -1.5256952 | 1.26E-13  | 3.62E-12   |
| Fbn1       | Down | -1.5219652 | 9.81E-09  | 1.76E-07   |
| Cxx1c      | Down | -1.5159589 | 1.08E-18  | 4.43E-17   |
| Cbfa2t3    | Down | -1.5151817 | 4.71E-13  | 1.30E-11   |
| 2310015A10 | Down | -1.5149366 | 4.02E-10  | 8.23E-09   |
| Alk        | Down | -1.5095834 | 3.01E-05  | 0.00031009 |
| Gpr56      | Down | -1.5089977 | 9.43E-129 | 7.97E-126  |
| Gm11734    | Down | -1.5089848 | 3.18E-05  | 0.00032407 |
| Arl4d      | Down | -1.5053422 | 4.17E-32  | 3.23E-30   |
| Plod2      | Down | -1.5044539 | 2.96E-08  | 4.99E-07   |
| Abca8a     | Down | -1.4969247 | 4.04E-05  | 0.00040275 |
| Tpbg       | Down | -1.4934824 | 2.44E-12  | 6.36E-11   |
| Erbp4      | Down | -1.4834818 | 4.35E-05  | 0.00042873 |
| Eno4       | Down | -1.4778795 | 3.44E-10  | 7.10E-09   |
| Phldb2     | Down | -1.4764406 | 9.54E-07  | 1.31E-05   |
| Fjx1       | Down | -1.4699389 | 3.67E-53  | 6.09E-51   |
| Col8a1     | Down | -1.4676731 | 1.22E-05  | 0.00013648 |
| Nanos1     | Down | -1.4616556 | 9.14E-41  | 1.01E-38   |
| Sh3pxd2b   | Down | -1.4610343 | 4.88E-32  | 3.77E-30   |
| Adam12     | Down | -1.4587252 | 7.83E-12  | 1.93E-10   |
| Thsd7a     | Down | -1.4574417 | 4.16E-07  | 6.02E-06   |
| Slc22a23   | Down | -1.4571594 | 1.88E-58  | 3.92E-56   |
| Cd248      | Down | -1.454637  | 1.10E-06  | 1.49E-05   |
| Arhgef40   | Down | -1.4537796 | 8.99E-09  | 1.62E-07   |
| Zfhx4      | Down | -1.4531272 | 1.10E-05  | 0.00012409 |
| Cntnap2    | Down | -1.4507642 | 3.99E-12  | 1.01E-10   |

|             |      |            |            |            |
|-------------|------|------------|------------|------------|
| Ankrd33b    | Down | -1.4482105 | 6.96E-05   | 0.0006561  |
| Foxp2       | Down | -1.4441106 | 4.57E-13   | 1.26E-11   |
| Efs         | Down | -1.439616  | 3.99E-54   | 6.94E-52   |
| Astn2       | Down | -1.4349865 | 1.10E-11   | 2.65E-10   |
| Sorcs3      | Down | -1.434547  | 7.56E-05   | 0.00070518 |
| Dgkb        | Down | -1.433512  | 8.42E-05   | 0.00077417 |
| Abca1       | Down | -1.4323938 | 9.89E-06   | 0.00011277 |
| Rnd3        | Down | -1.4319419 | 1.12E-17   | 4.25E-16   |
| Hdac7       | Down | -1.4288991 | 2.11E-23   | 1.07E-21   |
| Igdcc3      | Down | -1.4283605 | 2.23E-09   | 4.29E-08   |
| Lpar4       | Down | -1.4239163 | 1.10E-11   | 2.65E-10   |
| Nup62cl     | Down | -1.4192917 | 7.89E-05   | 0.00073188 |
| Prickle2    | Down | -1.4162318 | 1.69E-12   | 4.45E-11   |
| Tex15       | Down | -1.4159253 | 4.71E-06   | 5.68E-05   |
| Plxna1      | Down | -1.4123942 | 2.65E-51   | 4.09E-49   |
| Tmem176a    | Down | -1.411607  | 2.04E-06   | 2.63E-05   |
| Lypd6b      | Down | -1.4110941 | 3.01E-10   | 6.26E-09   |
| Cxzc5       | Down | -1.4105737 | 6.41E-27   | 4.05E-25   |
| 1700095J03R | Down | -1.4092848 | 9.42E-05   | 0.00085555 |
| Prss23      | Down | -1.4087112 | 7.67E-05   | 0.00071424 |
| Epha1       | Down | -1.4006593 | 0.00011429 | 0.00100967 |
| Gabrg3      | Down | -1.4004367 | 5.82E-06   | 6.89E-05   |
| Pik3r1      | Down | -1.3983014 | 8.25E-42   | 9.38E-40   |
| Mafb        | Down | -1.3972051 | 1.05E-25   | 6.18E-24   |
| Selenbp1    | Down | -1.3965228 | 1.21E-06   | 1.64E-05   |
| Prkcb       | Down | -1.3961323 | 7.19E-13   | 1.95E-11   |
| Ece1        | Down | -1.3958734 | 7.20E-14   | 2.12E-12   |
| Sp8         | Down | -1.3948274 | 1.57E-05   | 0.00017188 |
| D930048G16  | Down | -1.3934479 | 6.32E-05   | 0.00059974 |
| Kcns2       | Down | -1.3933285 | 0.00012414 | 0.00108372 |
| Col6a1      | Down | -1.3923677 | 0.00012482 | 0.00108857 |
| Prdm16      | Down | -1.3921855 | 1.99E-08   | 3.43E-07   |
| Tchh        | Down | -1.390758  | 0.00010837 | 0.00096793 |
| Podxl       | Down | -1.3887694 | 6.21E-14   | 1.84E-12   |
| Hcn1        | Down | -1.3878871 | 2.03E-07   | 3.08E-06   |
| 5031434C07I | Down | -1.3873543 | 5.99E-05   | 0.00057227 |
| Shisa7      | Down | -1.3836041 | 9.61E-19   | 3.95E-17   |
| Htr1a       | Down | -1.375586  | 0.00015277 | 0.00130044 |
| Igsf11      | Down | -1.3752835 | 0.00012436 | 0.00108516 |
| Pcdh7       | Down | -1.3748205 | 1.74E-15   | 5.68E-14   |
| Stat3       | Down | -1.3747025 | 8.60E-16   | 2.90E-14   |
| Sfxn5       | Down | -1.374335  | 1.20E-10   | 2.61E-09   |

|             |      |            |            |            |
|-------------|------|------------|------------|------------|
| Rnasel      | Down | -1.3740694 | 4.04E-10   | 8.26E-09   |
| Cdhr3       | Down | -1.3735755 | 0.00012565 | 0.00109476 |
| Gm9968      | Down | -1.3734545 | 7.72E-05   | 0.00071734 |
| Gjd2        | Down | -1.3732084 | 1.26E-06   | 1.69E-05   |
| Gpd1        | Down | -1.3713294 | 7.22E-11   | 1.59E-09   |
| Smo         | Down | -1.3685203 | 2.92E-24   | 1.57E-22   |
| Wnt7a       | Down | -1.3668156 | 1.02E-05   | 0.0001157  |
| 3010003L10f | Down | -1.3664845 | 7.61E-05   | 0.0007093  |
| Sostdc1     | Down | -1.3660133 | 0.00016728 | 0.00140841 |
| Dock1       | Down | -1.3649502 | 1.96E-09   | 3.77E-08   |
| Nap1l5      | Down | -1.364389  | 4.21E-27   | 2.70E-25   |
| Acr         | Down | -1.3638181 | 1.97E-05   | 0.00021181 |
| Pvrl1       | Down | -1.3637872 | 2.81E-22   | 1.35E-20   |
| Gm6277      | Down | -1.3637296 | 0.0001302  | 0.00112943 |
| Myb         | Down | -1.3563155 | 2.20E-06   | 2.81E-05   |
| 6330512M04  | Down | -1.3536914 | 0.00018957 | 0.00157588 |
| Adra2a      | Down | -1.3532173 | 1.11E-06   | 1.50E-05   |
| Prdm8       | Down | -1.348076  | 4.33E-20   | 1.89E-18   |
| Ly75        | Down | -1.3480236 | 0.00018885 | 0.00157062 |
| Itgb8       | Down | -1.3457711 | 1.63E-06   | 2.14E-05   |
| Grb10       | Down | -1.3402761 | 7.89E-17   | 2.82E-15   |
| Zic1        | Down | -1.3394516 | 1.12E-05   | 0.00012656 |
| E130114P18f | Down | -1.339379  | 1.28E-14   | 4.00E-13   |
| Kcnab3      | Down | -1.3389022 | 6.62E-15   | 2.11E-13   |
| Nhlh2       | Down | -1.3372313 | 1.08E-27   | 7.26E-26   |
| Tmem191c    | Down | -1.3332726 | 2.33E-05   | 0.0002458  |
| Syt7        | Down | -1.3307794 | 7.37E-49   | 1.05E-46   |
| Gm16551     | Down | -1.3299228 | 0.0002016  | 0.00165876 |
| Gpr139      | Down | -1.3289846 | 3.84E-05   | 0.00038348 |
| Tmem90a     | Down | -1.3287093 | 6.25E-09   | 1.15E-07   |
| Nhlh1       | Down | -1.3260002 | 6.24E-17   | 2.26E-15   |
| Xkr4        | Down | -1.3252805 | 1.06E-15   | 3.53E-14   |
| Gm4793      | Down | -1.32463   | 0.00025673 | 0.00205152 |
| Gm17244     | Down | -1.3220955 | 8.36E-05   | 0.00077029 |
| RP23-454G7. | Down | -1.3202693 | 0.0002472  | 0.00198702 |
| Rin2        | Down | -1.3197228 | 1.00E-06   | 1.37E-05   |
| Col19a1     | Down | -1.3187671 | 0.00028972 | 0.00227621 |
| Rhbdf1      | Down | -1.3185684 | 0.0002672  | 0.00212564 |
| Hap1        | Down | -1.3148028 | 8.37E-11   | 1.84E-09   |
| Arhgap28    | Down | -1.3104105 | 1.51E-07   | 2.34E-06   |
| Gm13111     | Down | -1.3101765 | 0.00016105 | 0.00136237 |
| Tlcd2       | Down | -1.3097732 | 4.23E-10   | 8.61E-09   |

|             |      |            |            |            |
|-------------|------|------------|------------|------------|
| BC030500    | Down | -1.3095467 | 9.23E-05   | 0.00084013 |
| Nrgn        | Down | -1.3071473 | 0.00024691 | 0.00198553 |
| Zfpm1       | Down | -1.3026444 | 1.58E-09   | 3.07E-08   |
| Gm11537     | Down | -1.3010554 | 2.67E-05   | 0.00027791 |
| Lpar3       | Down | -1.3002395 | 0.00025496 | 0.00204017 |
| Gm11549     | Down | -1.2986703 | 0.00014659 | 0.00125321 |
| Trpc7       | Down | -1.2977687 | 1.21E-09   | 2.37E-08   |
| Col11a2     | Down | -1.2965399 | 0.00035613 | 0.00271505 |
| Bmp8b       | Down | -1.2965329 | 0.00037354 | 0.00282233 |
| Slc32a1     | Down | -1.2952416 | 0.0002693  | 0.00214114 |
| Cd63        | Down | -1.2932737 | 1.17E-13   | 3.37E-12   |
| Zbtb20      | Down | -1.2900295 | 2.72E-08   | 4.60E-07   |
| Gm17588     | Down | -1.2858402 | 1.43E-09   | 2.80E-08   |
| Kcnc2       | Down | -1.2851276 | 1.49E-05   | 0.00016363 |
| Pcdh15      | Down | -1.2848886 | 0.00011429 | 0.00100967 |
| Elfn1       | Down | -1.2844004 | 1.85E-05   | 0.00020011 |
| Cldn12      | Down | -1.279228  | 9.92E-13   | 2.65E-11   |
| Sec14l2     | Down | -1.2785933 | 1.88E-05   | 0.00020315 |
| Coro2b      | Down | -1.2766171 | 8.64E-21   | 3.90E-19   |
| Tgfb3       | Down | -1.2748042 | 5.90E-12   | 1.46E-10   |
| D17H6S56E-3 | Down | -1.2738098 | 0.00037939 | 0.00285919 |
| 5330413P13I | Down | -1.2732842 | 0.00040739 | 0.00304055 |
| Pls3        | Down | -1.2729254 | 6.31E-14   | 1.87E-12   |
| Slc10a6     | Down | -1.2717669 | 0.00021361 | 0.00174387 |
| Gm13889     | Down | -1.2707833 | 0.00017558 | 0.00146994 |
| Mob3b       | Down | -1.269035  | 5.56E-05   | 0.00053517 |
| Gm17685     | Down | -1.2680389 | 0.00039792 | 0.00298362 |
| Fam163b     | Down | -1.2675984 | 8.94E-05   | 0.00081747 |
| Hist1h1e    | Down | -1.2656241 | 6.84E-06   | 8.01E-05   |
| Olfm1       | Down | -1.2645954 | 3.82E-32   | 2.97E-30   |
| Irs1        | Down | -1.2617854 | 2.14E-09   | 4.12E-08   |
| Sh3pxd2a    | Down | -1.2606903 | 1.31E-27   | 8.71E-26   |
| E030013I19R | Down | -1.2582422 | 0.00054432 | 0.00390798 |
| Dffb        | Down | -1.2581066 | 2.81E-12   | 7.26E-11   |
| Bai2        | Down | -1.2561233 | 2.24E-13   | 6.31E-12   |
| Rasl11a     | Down | -1.2558934 | 3.26E-06   | 4.05E-05   |
| Nynrin      | Down | -1.253069  | 4.50E-17   | 1.64E-15   |
| Dach2       | Down | -1.2526586 | 3.52E-06   | 4.35E-05   |
| Pard3       | Down | -1.2510483 | 6.95E-10   | 1.39E-08   |
| Nrcam       | Down | -1.2482132 | 1.29E-17   | 4.90E-16   |
| Sox21       | Down | -1.247849  | 0.00035571 | 0.00271296 |
| Gm15381     | Down | -1.2465032 | 0.00036496 | 0.0027645  |

|             |      |            |            |            |
|-------------|------|------------|------------|------------|
| Pion        | Down | -1.246034  | 3.83E-06   | 4.70E-05   |
| Ccdc8       | Down | -1.2389801 | 2.86E-07   | 4.24E-06   |
| Cdh20       | Down | -1.2363115 | 0.00029059 | 0.00227987 |
| Tead3       | Down | -1.2346236 | 1.73E-05   | 0.00018868 |
| Clrn1       | Down | -1.2342841 | 8.35E-05   | 0.00076932 |
| Adamts6     | Down | -1.2314457 | 0.0003956  | 0.0029675  |
| Hcn4        | Down | -1.2310907 | 9.67E-28   | 6.50E-26   |
| Fam20a      | Down | -1.2300817 | 0.00011274 | 0.0009985  |
| Acss1       | Down | -1.2300008 | 2.36E-11   | 5.47E-10   |
| 1110002J07R | Down | -1.2298824 | 8.87E-07   | 1.23E-05   |
| Nwd1        | Down | -1.228591  | 3.97E-06   | 4.85E-05   |
| Adamts8     | Down | -1.226872  | 0.00053252 | 0.0038326  |
| Tmem132d    | Down | -1.2265002 | 0.00044859 | 0.00331318 |
| Bbc3        | Down | -1.2262675 | 2.97E-09   | 5.63E-08   |
| 5330417C22I | Down | -1.2243172 | 9.89E-07   | 1.36E-05   |
| Eomes       | Down | -1.2239989 | 0.00058398 | 0.0041541  |
| Gm5567      | Down | -1.2227567 | 9.80E-27   | 6.15E-25   |
| Kcnj6       | Down | -1.2227522 | 0.00057267 | 0.00408348 |
| Zic4        | Down | -1.2206234 | 0.00077497 | 0.0052986  |
| Rbms3       | Down | -1.2195125 | 0.00010869 | 0.00097035 |
| Mavs        | Down | -1.2195046 | 0.00058021 | 0.00413056 |
| Csdc2       | Down | -1.2186809 | 4.82E-40   | 5.09E-38   |
| Pgcp        | Down | -1.215635  | 0.00083086 | 0.00562194 |
| Cdk14       | Down | -1.2138624 | 2.38E-16   | 8.30E-15   |
| Tmc7        | Down | -1.2125696 | 5.24E-12   | 1.31E-10   |
| Zfp641      | Down | -1.2120742 | 2.03E-05   | 0.00021752 |
| Tfap2c      | Down | -1.2116215 | 0.00016864 | 0.00141851 |
| Amigo1      | Down | -1.2113805 | 4.75E-33   | 3.80E-31   |
| Id4         | Down | -1.211211  | 3.08E-16   | 1.06E-14   |
| Dlx5        | Down | -1.2111582 | 0.0006922  | 0.00482529 |
| Zc3h12c     | Down | -1.2104948 | 1.42E-08   | 2.52E-07   |
| Itga6       | Down | -1.2083485 | 3.73E-19   | 1.55E-17   |
| Fgf7        | Down | -1.205309  | 0.00069512 | 0.00483992 |
| Kcnh5       | Down | -1.2037886 | 4.57E-08   | 7.53E-07   |
| Tirap       | Down | -1.2032199 | 5.50E-05   | 0.0005298  |
| Slc24a3     | Down | -1.2006043 | 0.00031217 | 0.0024236  |
| Garnl3      | Up   | 1.20076554 | 1.34E-13   | 3.83E-12   |
| Palmd       | Up   | 1.20092751 | 1.13E-06   | 1.54E-05   |
| Lphn2       | Up   | 1.20191521 | 2.67E-16   | 9.27E-15   |
| Gm11818     | Up   | 1.20341067 | 2.68E-16   | 9.30E-15   |
| 2810032G03  | Up   | 1.20483025 | 6.28E-20   | 2.71E-18   |
| Gm12522     | Up   | 1.2052131  | 2.50E-05   | 0.00026203 |

|             |    |            |            |            |
|-------------|----|------------|------------|------------|
| Ldb3        | Up | 1.21056547 | 2.75E-06   | 3.45E-05   |
| Gm12408     | Up | 1.21099814 | 0.00079805 | 0.00543049 |
| Phgdh       | Up | 1.21361384 | 4.45E-11   | 1.00E-09   |
| Rasal1      | Up | 1.21582047 | 0.0006865  | 0.00479119 |
| Nrip1       | Up | 1.21619599 | 9.37E-29   | 6.52E-27   |
| Satb2       | Up | 1.22236584 | 3.07E-10   | 6.38E-09   |
| Gabrd       | Up | 1.22513842 | 0.0007722  | 0.00529149 |
| Pmaip1      | Up | 1.22624731 | 0.00026359 | 0.00209876 |
| Fam81a      | Up | 1.22678181 | 1.97E-08   | 3.42E-07   |
| Hexb        | Up | 1.22729006 | 3.05E-08   | 5.12E-07   |
| Cyp7b1      | Up | 1.2276772  | 8.98E-10   | 1.78E-08   |
| Rasgef1b    | Up | 1.22838406 | 5.26E-32   | 4.04E-30   |
| Cdkl1       | Up | 1.22905615 | 0.00055781 | 0.00399195 |
| Foxred2     | Up | 1.23103306 | 3.44E-09   | 6.49E-08   |
| Ppm1e       | Up | 1.23106738 | 9.67E-36   | 8.63E-34   |
| Efhc2       | Up | 1.23523819 | 1.69E-05   | 0.00018439 |
| Cnksr2      | Up | 1.23612553 | 8.63E-19   | 3.56E-17   |
| Dok5        | Up | 1.23629034 | 4.74E-06   | 5.71E-05   |
| Lrrc6       | Up | 1.23733402 | 1.03E-05   | 0.00011701 |
| Gm15606     | Up | 1.23776332 | 0.00053035 | 0.00381855 |
| Diras2      | Up | 1.23913287 | 3.93E-08   | 6.54E-07   |
| Pgam1-ps2   | Up | 1.24180196 | 0.00010405 | 0.00093549 |
| B230217O12  | Up | 1.24475991 | 0.0001332  | 0.00115153 |
| Sec24d      | Up | 1.24648967 | 2.60E-18   | 1.03E-16   |
| 1110002E22f | Up | 1.24702373 | 0.00062332 | 0.00440215 |
| Nrip3       | Up | 1.25241769 | 1.64E-06   | 2.15E-05   |
| Rnf17       | Up | 1.2546405  | 0.00033595 | 0.00258266 |
| Fibcd1      | Up | 1.25564661 | 2.62E-06   | 3.31E-05   |
| Pabpc1l     | Up | 1.26020382 | 4.61E-06   | 5.57E-05   |
| Jakmip3     | Up | 1.26363652 | 2.73E-05   | 0.00028399 |
| Dmrt2       | Up | 1.26409574 | 0.00030319 | 0.00236531 |
| Kit         | Up | 1.26466757 | 2.41E-17   | 9.02E-16   |
| Ezr         | Up | 1.26471852 | 1.31E-09   | 2.57E-08   |
| Rftn1       | Up | 1.26736312 | 6.91E-05   | 0.00065164 |
| Grem1       | Up | 1.26986495 | 2.09E-05   | 0.00022291 |
| Mak         | Up | 1.273745   | 0.00047695 | 0.00348924 |
| Prr5        | Up | 1.28725504 | 4.41E-09   | 8.23E-08   |
| Gm8116      | Up | 1.28996536 | 0.00038379 | 0.00288865 |
| Pdzrn4      | Up | 1.29086002 | 1.91E-05   | 0.0002059  |
| Robo2       | Up | 1.29140415 | 1.64E-14   | 5.07E-13   |
| Khdrbs2     | Up | 1.29545393 | 5.10E-13   | 1.40E-11   |
| Zfp238      | Up | 1.2958895  | 0.00033522 | 0.00257886 |

|             |    |            |            |            |
|-------------|----|------------|------------|------------|
| Scd1        | Up | 1.30693719 | 5.08E-18   | 1.98E-16   |
| A330102I10R | Up | 1.30845157 | 6.78E-05   | 0.00064118 |
| Cacna1i     | Up | 1.3158908  | 2.42E-05   | 0.00025479 |
| Zfp503      | Up | 1.32373279 | 7.63E-06   | 8.86E-05   |
| Hif3a       | Up | 1.32524457 | 1.55E-11   | 3.65E-10   |
| D3Bwg0562e  | Up | 1.32639463 | 1.72E-07   | 2.65E-06   |
| Wfs1        | Up | 1.32661747 | 4.67E-08   | 7.69E-07   |
| Slc6a15     | Up | 1.32721468 | 9.18E-22   | 4.30E-20   |
| Adamts13    | Up | 1.32887367 | 0.0002702  | 0.00214657 |
| Slc1a3      | Up | 1.32940283 | 9.69E-16   | 3.24E-14   |
| Scube1      | Up | 1.32975546 | 1.68E-20   | 7.48E-19   |
| A330008L17I | Up | 1.33327723 | 5.20E-07   | 7.38E-06   |
| Kcnj9       | Up | 1.33384796 | 2.87E-05   | 0.00029641 |
| Srgap1      | Up | 1.33736729 | 7.59E-18   | 2.91E-16   |
| Rorb        | Up | 1.34342385 | 1.46E-18   | 5.91E-17   |
| Mdga1       | Up | 1.34896299 | 6.05E-26   | 3.61E-24   |
| 1110007C09I | Up | 1.34992232 | 2.29E-10   | 4.84E-09   |
| Gfra2       | Up | 1.35326971 | 2.38E-07   | 3.58E-06   |
| Sox2ot      | Up | 1.35401028 | 6.07E-06   | 7.17E-05   |
| 4430402I18R | Up | 1.35479314 | 4.07E-05   | 0.00040473 |
| Vrk2        | Up | 1.35557241 | 8.43E-05   | 0.00077417 |
| 9030418K01I | Up | 1.36092091 | 5.56E-09   | 1.03E-07   |
| Tmprss5     | Up | 1.36108414 | 0.00017737 | 0.00148281 |
| Pappa2      | Up | 1.36345882 | 1.47E-15   | 4.84E-14   |
| Sema6d      | Up | 1.36547052 | 4.55E-13   | 1.26E-11   |
| Ifitm2      | Up | 1.36699819 | 7.19E-17   | 2.58E-15   |
| 2900079G21  | Up | 1.36904525 | 2.15E-06   | 2.75E-05   |
| Wbscr17     | Up | 1.37325656 | 4.87E-30   | 3.49E-28   |
| Gm13716     | Up | 1.37401171 | 1.43E-08   | 2.53E-07   |
| Gm10118     | Up | 1.3741324  | 4.35E-05   | 0.00042873 |
| Acot1       | Up | 1.37526147 | 4.49E-14   | 1.34E-12   |
| Ntsr2       | Up | 1.37708712 | 0.00015711 | 0.00133483 |
| Ucma        | Up | 1.38338796 | 0.00011198 | 0.00099321 |
| Nrsn2       | Up | 1.38614045 | 1.08E-05   | 0.00012193 |
| Cdkl2       | Up | 1.38650464 | 5.93E-11   | 1.32E-09   |
| Gm16894     | Up | 1.39060552 | 0.0001044  | 0.0009377  |
| A430078G23  | Up | 1.3915425  | 4.55E-07   | 6.53E-06   |
| Itm2b       | Up | 1.39184865 | 9.62E-35   | 8.37E-33   |
| Lrrtm3      | Up | 1.39260481 | 1.73E-08   | 3.02E-07   |
| Pth1r       | Up | 1.39304426 | 2.12E-06   | 2.71E-05   |
| Kcnk12      | Up | 1.39514996 | 3.12E-07   | 4.59E-06   |
| Ankrd34a    | Up | 1.39919933 | 5.94E-11   | 1.32E-09   |



|             |    |            |          |            |
|-------------|----|------------|----------|------------|
| 6330403L08F | Up | 1.40067741 | 1.48E-06 | 1.97E-05   |
| Stmn2       | Up | 1.40188541 | 1.78E-34 | 1.53E-32   |
| Htati2      | Up | 1.40225802 | 1.77E-05 | 0.00019207 |
| Opcml       | Up | 1.40257674 | 5.60E-18 | 2.16E-16   |
| Efna1       | Up | 1.41285252 | 4.51E-06 | 5.45E-05   |
| Tmtc1       | Up | 1.41775779 | 2.99E-13 | 8.36E-12   |
| Ckmt1       | Up | 1.41824493 | 1.39E-25 | 8.08E-24   |
| Gabrb2      | Up | 1.43085432 | 7.24E-21 | 3.28E-19   |
| Ablim1      | Up | 1.43325107 | 8.56E-26 | 5.08E-24   |
| Itm2a       | Up | 1.43880996 | 3.61E-12 | 9.22E-11   |
| Dact2       | Up | 1.43924092 | 2.46E-06 | 3.12E-05   |
| Hspa12a     | Up | 1.44075903 | 6.93E-51 | 1.05E-48   |
| Klf8        | Up | 1.44077261 | 1.00E-32 | 7.95E-31   |
| Grb14       | Up | 1.44222408 | 3.51E-07 | 5.13E-06   |
| Prokr2      | Up | 1.4433285  | 2.31E-07 | 3.49E-06   |
| Cntn1       | Up | 1.45131143 | 1.02E-15 | 3.41E-14   |
| Fam43b      | Up | 1.45270419 | 2.00E-06 | 2.58E-05   |
| Pcdh20      | Up | 1.4531849  | 4.02E-10 | 8.23E-09   |
| Nos1        | Up | 1.45476507 | 1.57E-13 | 4.46E-12   |
| Pbx1        | Up | 1.45659475 | 2.73E-48 | 3.84E-46   |
| 4933415D12  | Up | 1.45844011 | 7.14E-07 | 9.98E-06   |
| Efcab6      | Up | 1.45855312 | 2.00E-07 | 3.05E-06   |
| Slc26a7     | Up | 1.45877699 | 4.11E-05 | 0.00040844 |
| Acbd4       | Up | 1.46551259 | 2.01E-16 | 7.07E-15   |
| A930017M01  | Up | 1.46987171 | 4.19E-05 | 0.00041602 |
| Timp2       | Up | 1.47110641 | 3.22E-19 | 1.35E-17   |
| Fam160a1    | Up | 1.47277235 | 5.39E-05 | 0.00052191 |
| Ccdc111     | Up | 1.47341115 | 7.12E-15 | 2.26E-13   |
| Cys1        | Up | 1.47926539 | 6.68E-06 | 7.85E-05   |
| Iqj         | Up | 1.48062418 | 1.48E-06 | 1.96E-05   |
| Lamb1       | Up | 1.48738287 | 2.58E-24 | 1.39E-22   |
| Gstm6       | Up | 1.48950676 | 4.34E-05 | 0.00042863 |
| BC024139    | Up | 1.49059232 | 6.99E-18 | 2.69E-16   |
| Ppp1r1b     | Up | 1.49352284 | 1.06E-23 | 5.46E-22   |
| 6330403A02  | Up | 1.49617565 | 6.76E-06 | 7.94E-05   |
| Pde11a      | Up | 1.50399433 | 2.40E-08 | 4.10E-07   |
| Lrrc55      | Up | 1.50744434 | 6.34E-25 | 3.60E-23   |
| Pdgfc       | Up | 1.50746912 | 1.90E-14 | 5.83E-13   |
| A730056A06  | Up | 1.51257918 | 1.31E-05 | 0.00014554 |
| Ank1        | Up | 1.52166476 | 2.71E-08 | 4.59E-07   |
| Fgfr2       | Up | 1.52481658 | 1.59E-13 | 4.51E-12   |
| Fzd7        | Up | 1.52974074 | 1.19E-13 | 3.42E-12   |

|             |    |            |          |            |
|-------------|----|------------|----------|------------|
| Npas2       | Up | 1.53213544 | 6.62E-08 | 1.07E-06   |
| Bmp3        | Up | 1.53321743 | 3.32E-13 | 9.26E-12   |
| Penk        | Up | 1.55179962 | 7.67E-06 | 8.90E-05   |
| Mfsd2a      | Up | 1.55256454 | 2.39E-17 | 8.95E-16   |
| Gab1        | Up | 1.55886638 | 8.68E-41 | 9.63E-39   |
| Gm11767     | Up | 1.55972883 | 4.65E-06 | 5.61E-05   |
| Ptprt       | Up | 1.5608204  | 7.12E-07 | 9.96E-06   |
| Spink13     | Up | 1.5641949  | 1.26E-05 | 0.00014099 |
| 2210404007  | Up | 1.56710419 | 2.94E-07 | 4.35E-06   |
| Vsnl1       | Up | 1.56802585 | 1.69E-10 | 3.64E-09   |
| Trim67      | Up | 1.57249108 | 4.15E-20 | 1.82E-18   |
| Nfe2l3      | Up | 1.57259637 | 2.95E-21 | 1.35E-19   |
| Hivep2      | Up | 1.57715081 | 7.02E-36 | 6.29E-34   |
| Atp4a       | Up | 1.58210974 | 9.72E-07 | 1.33E-05   |
| 4833418N02  | Up | 1.58498568 | 1.35E-14 | 4.21E-13   |
| Bag2        | Up | 1.58772081 | 2.59E-22 | 1.25E-20   |
| 2610019F03F | Up | 1.58781824 | 1.73E-10 | 3.70E-09   |
| Slc16a1     | Up | 1.58972169 | 2.63E-52 | 4.25E-50   |
| Smad6       | Up | 1.59333679 | 3.57E-11 | 8.12E-10   |
| Pcdh19      | Up | 1.59547663 | 8.45E-14 | 2.47E-12   |
| Gm15672     | Up | 1.59848561 | 4.11E-06 | 5.01E-05   |
| Nab2        | Up | 1.60268163 | 1.93E-14 | 5.92E-13   |
| Tcf15       | Up | 1.6087     | 8.72E-06 | 0.00010097 |
| Gnb4        | Up | 1.61211913 | 8.13E-45 | 1.02E-42   |
| Kctd4       | Up | 1.61302506 | 3.38E-06 | 4.18E-05   |
| Tnr         | Up | 1.61309459 | 1.88E-23 | 9.55E-22   |
| Mta3        | Up | 1.61325465 | 2.84E-65 | 6.73E-63   |
| Lnx2        | Up | 1.62781738 | 1.18E-31 | 8.89E-30   |
| Dlc1        | Up | 1.64172388 | 3.99E-14 | 1.20E-12   |
| Sel1l3      | Up | 1.64272052 | 1.72E-22 | 8.38E-21   |
| Fbxl21      | Up | 1.64666566 | 4.91E-11 | 1.10E-09   |
| Epb4.9      | Up | 1.64780292 | 1.94E-23 | 9.85E-22   |
| Luzp2       | Up | 1.65261274 | 5.44E-12 | 1.36E-10   |
| Ndrp1       | Up | 1.65405896 | 1.41E-24 | 7.84E-23   |
| Ifngr2      | Up | 1.65643774 | 1.91E-42 | 2.20E-40   |
| Ly6g6e      | Up | 1.65720246 | 2.75E-10 | 5.77E-09   |
| Hapln3      | Up | 1.65932401 | 5.13E-06 | 6.14E-05   |
| Pde4d       | Up | 1.66555584 | 9.93E-57 | 1.94E-54   |
| Camk2a      | Up | 1.6717126  | 4.23E-15 | 1.35E-13   |
| Plk2        | Up | 1.67416283 | 2.01E-17 | 7.56E-16   |
| Syce2       | Up | 1.67784572 | 5.50E-17 | 1.99E-15   |
| Tmem74      | Up | 1.68004882 | 7.70E-28 | 5.20E-26   |

|              |    |            |          |          |
|--------------|----|------------|----------|----------|
| Thbs1        | Up | 1.68161508 | 5.20E-08 | 8.51E-07 |
| 1700086L19F  | Up | 1.6922693  | 3.32E-06 | 4.12E-05 |
| Camk4        | Up | 1.69701492 | 5.98E-28 | 4.05E-26 |
| Tbata        | Up | 1.70377871 | 7.30E-09 | 1.33E-07 |
| Tg           | Up | 1.71637703 | 1.64E-06 | 2.14E-05 |
| Pnliprp1     | Up | 1.72240919 | 7.83E-08 | 1.26E-06 |
| Trpc3        | Up | 1.72376837 | 3.95E-07 | 5.73E-06 |
| Gpr26        | Up | 1.72578483 | 1.60E-23 | 8.19E-22 |
| Dpp10        | Up | 1.73366547 | 5.05E-12 | 1.27E-10 |
| Shisa6       | Up | 1.73428336 | 3.00E-12 | 7.74E-11 |
| Slc17a7      | Up | 1.75281814 | 1.99E-29 | 1.41E-27 |
| Aspg         | Up | 1.75374993 | 1.51E-06 | 2.00E-05 |
| Bves         | Up | 1.75544642 | 1.42E-06 | 1.89E-05 |
| Galntl4      | Up | 1.76189183 | 1.12E-19 | 4.80E-18 |
| Ripply2      | Up | 1.77208618 | 9.70E-08 | 1.55E-06 |
| Nav2         | Up | 1.77790107 | 2.56E-16 | 8.91E-15 |
| Fras1        | Up | 1.78333054 | 1.13E-21 | 5.30E-20 |
| Pcsk2        | Up | 1.79125053 | 2.84E-17 | 1.06E-15 |
| A730046J19F  | Up | 1.79313482 | 5.89E-07 | 8.32E-06 |
| Gm16871      | Up | 1.79839179 | 6.22E-09 | 1.14E-07 |
| Dbpht2       | Up | 1.80352208 | 4.81E-07 | 6.89E-06 |
| Akap12       | Up | 1.80462331 | 2.75E-14 | 8.34E-13 |
| Adamts17     | Up | 1.81029214 | 6.20E-46 | 8.09E-44 |
| D18Erttd653e | Up | 1.81421212 | 2.89E-10 | 6.04E-09 |
| 2610035D17I  | Up | 1.81847483 | 1.41E-47 | 1.96E-45 |
| Slc35f4      | Up | 1.81897882 | 6.44E-08 | 1.04E-06 |
| Chrm1        | Up | 1.82672949 | 1.39E-11 | 3.32E-10 |
| Cdh6         | Up | 1.82680985 | 4.67E-12 | 1.18E-10 |
| Dusp15       | Up | 1.82857048 | 1.64E-28 | 1.13E-26 |
| Adrb1        | Up | 1.83214502 | 5.10E-13 | 1.40E-11 |
| Kcng3        | Up | 1.83749738 | 4.22E-07 | 6.10E-06 |
| Kcng1        | Up | 1.84587827 | 2.43E-17 | 9.07E-16 |
| St18         | Up | 1.84718892 | 1.99E-27 | 1.30E-25 |
| Sox5         | Up | 1.85026453 | 1.42E-38 | 1.40E-36 |
| Csrp2        | Up | 1.87060652 | 9.43E-30 | 6.72E-28 |
| Peli2        | Up | 1.87532819 | 1.97E-30 | 1.44E-28 |
| 2900026A02I  | Up | 1.88585546 | 3.97E-20 | 1.75E-18 |
| Gria3        | Up | 1.88729068 | 3.49E-53 | 5.84E-51 |
| Kcnt2        | Up | 1.89144037 | 3.07E-23 | 1.53E-21 |
| Bcl2         | Up | 1.91434419 | 1.44E-26 | 8.94E-25 |
| Osbpl6       | Up | 1.93079969 | 2.39E-16 | 8.33E-15 |
| Stac2        | Up | 1.93566293 | 2.75E-16 | 9.53E-15 |

|             |    |            |          |          |
|-------------|----|------------|----------|----------|
| Ucp2        | Up | 1.94205586 | 7.14E-46 | 9.25E-44 |
| 4-Mar       | Up | 1.94910782 | 2.01E-42 | 2.31E-40 |
| Rspo3       | Up | 1.96946828 | 6.73E-82 | 2.21E-79 |
| Fzd1        | Up | 1.97141957 | 7.89E-35 | 6.90E-33 |
| Nptx1       | Up | 1.974991   | 2.18E-58 | 4.50E-56 |
| Chdh        | Up | 1.99798222 | 1.58E-08 | 2.78E-07 |
| Robo1       | Up | 1.99975738 | 1.61E-95 | 7.12E-93 |
| 2310069G16  | Up | 2.00308753 | 1.63E-08 | 2.86E-07 |
| Slc5a5      | Up | 2.00807147 | 1.14E-11 | 2.74E-10 |
| Pygl        | Up | 2.0135977  | 5.24E-11 | 1.17E-09 |
| Glra2       | Up | 2.01650386 | 3.66E-24 | 1.96E-22 |
| Frmd4a      | Up | 2.02113383 | 1.47E-47 | 2.02E-45 |
| Rtn4rl1     | Up | 2.02832285 | 1.83E-23 | 9.32E-22 |
| Nrp1        | Up | 2.03480285 | 1.64E-21 | 7.62E-20 |
| Smarcd3     | Up | 2.04008397 | 1.94E-92 | 7.83E-90 |
| Mapkapk3    | Up | 2.05122433 | 3.93E-09 | 7.38E-08 |
| lyd         | Up | 2.05593577 | 1.59E-08 | 2.79E-07 |
| Wdr66       | Up | 2.0591929  | 2.69E-14 | 8.19E-13 |
| St3gal1     | Up | 2.06749985 | 1.84E-27 | 1.21E-25 |
| Rnd1        | Up | 2.06996239 | 1.06E-36 | 9.88E-35 |
| Ptprz1      | Up | 2.07202626 | 2.64E-87 | 9.96E-85 |
| Prex1       | Up | 2.07794279 | 1.12E-81 | 3.62E-79 |
| Bcl6b       | Up | 2.09024198 | 4.42E-27 | 2.82E-25 |
| Rapgef11    | Up | 2.09201823 | 9.60E-32 | 7.31E-30 |
| Dpf3        | Up | 2.12012217 | 1.99E-52 | 3.25E-50 |
| Hs3st2      | Up | 2.12501667 | 5.20E-10 | 1.05E-08 |
| Gucy1a3     | Up | 2.12833775 | 3.92E-17 | 1.43E-15 |
| Lhfp        | Up | 2.13302481 | 9.96E-29 | 6.91E-27 |
| Gipr        | Up | 2.1345329  | 1.66E-12 | 4.38E-11 |
| 2310046A06I | Up | 2.13619003 | 1.21E-09 | 2.38E-08 |
| Btbd11      | Up | 2.15440888 | 2.47E-23 | 1.24E-21 |
| Mef2c       | Up | 2.19272947 | 6.07E-50 | 8.98E-48 |
| Zfp703      | Up | 2.19662185 | 1.07E-43 | 1.30E-41 |
| A830011K09I | Up | 2.19760026 | 1.35E-13 | 3.85E-12 |
| Adora1      | Up | 2.23298882 | 2.84E-59 | 6.00E-57 |
| Rapgef5     | Up | 2.23424719 | 6.85E-27 | 4.31E-25 |
| 4833424O15  | Up | 2.23619365 | 6.22E-22 | 2.94E-20 |
| Bend6       | Up | 2.2443296  | 1.74E-33 | 1.41E-31 |
| Ttc7        | Up | 2.24485038 | 2.89E-17 | 1.07E-15 |
| Ush1c       | Up | 2.24692678 | 3.96E-23 | 1.97E-21 |
| Dync1i1     | Up | 2.26390418 | 1.51E-57 | 3.04E-55 |
| Usp43       | Up | 2.27039127 | 9.32E-12 | 2.28E-10 |

|          |    |            |           |           |
|----------|----|------------|-----------|-----------|
| Trim9    | Up | 2.28408967 | 5.42E-45  | 6.97E-43  |
| Sla      | Up | 2.29619624 | 8.71E-23  | 4.32E-21  |
| Klf4     | Up | 2.31500888 | 2.06E-12  | 5.40E-11  |
| Ppp1r14c | Up | 2.32508663 | 3.23E-15  | 1.04E-13  |
| Wnt7b    | Up | 2.32716884 | 4.92E-50  | 7.33E-48  |
| Grm1     | Up | 2.33065496 | 4.91E-16  | 1.68E-14  |
| Inhbb    | Up | 2.33206435 | 5.30E-35  | 4.68E-33  |
| Pkdcc    | Up | 2.33210931 | 8.82E-17  | 3.15E-15  |
| Lrfn5    | Up | 2.34929977 | 1.16E-44  | 1.43E-42  |
| Tusc5    | Up | 2.36043861 | 9.02E-11  | 1.97E-09  |
| Fn1      | Up | 2.36507864 | 1.47E-26  | 9.14E-25  |
| Nr0b1    | Up | 2.36605274 | 7.03E-11  | 1.55E-09  |
| Gpr176   | Up | 2.38592999 | 2.07E-22  | 1.01E-20  |
| Grik3    | Up | 2.39343094 | 6.50E-56  | 1.20E-53  |
| Nr4a3    | Up | 2.41695714 | 7.74E-99  | 3.93E-96  |
| Kcnq3    | Up | 2.4336326  | 3.40E-101 | 1.83E-98  |
| Hs6st2   | Up | 2.43795659 | 4.12E-116 | 2.81E-113 |
| Magi3    | Up | 2.43886157 | 6.26E-125 | 4.83E-122 |
| Sh3bgrl2 | Up | 2.44112332 | 2.02E-96  | 9.17E-94  |
| Arpp21   | Up | 2.45777422 | 1.32E-84  | 4.88E-82  |
| Inhba    | Up | 2.46221187 | 1.41E-11  | 3.35E-10  |
| Kcnh3    | Up | 2.46407519 | 2.71E-76  | 8.16E-74  |
| Trnp1    | Up | 2.47830746 | 8.77E-65  | 2.02E-62  |
| Cdh11    | Up | 2.49231766 | 1.79E-94  | 7.75E-92  |
| Inf2     | Up | 2.5019784  | 1.53E-23  | 7.87E-22  |
| Adamts20 | Up | 2.50918212 | 4.31E-22  | 2.05E-20  |
| Slc44a5  | Up | 2.51064288 | 1.54E-43  | 1.86E-41  |
| Rgnf     | Up | 2.54955301 | 1.99E-28  | 1.37E-26  |
| Gnal     | Up | 2.55635569 | 2.20E-56  | 4.24E-54  |
| Sstr3    | Up | 2.56010159 | 9.77E-32  | 7.41E-30  |
| Cap2     | Up | 2.56992898 | 1.09E-30  | 8.02E-29  |
| Syt4     | Up | 2.57146922 | 4.15E-71  | 1.08E-68  |
| Chst8    | Up | 2.61118994 | 6.96E-35  | 6.12E-33  |
| Mpped1   | Up | 2.63603605 | 2.67E-144 | 4.31E-141 |
| Rgma     | Up | 2.65769467 | 4.10E-35  | 3.64E-33  |
| Baiap2   | Up | 2.66468845 | 1.96E-54  | 3.44E-52  |
| Enc1     | Up | 2.69155991 | 5.80E-129 | 5.15E-126 |
| Tox      | Up | 2.73075121 | 1.78E-96  | 8.30E-94  |
| Alg13    | Up | 2.76026447 | 2.08E-140 | 2.31E-137 |
| Kcnv1    | Up | 2.78732463 | 3.54E-38  | 3.41E-36  |
| Rph3a    | Up | 2.79989441 | 1.52E-33  | 1.23E-31  |
| Ldb2     | Up | 2.80320244 | 9.58E-68  | 2.46E-65  |

|             |    |            |           |           |
|-------------|----|------------|-----------|-----------|
| Kctd8       | Up | 2.85777009 | 2.78E-40  | 3.01E-38  |
| 9930013L23F | Up | 2.89663836 | 5.72E-43  | 6.68E-41  |
| Rassf3      | Up | 2.9087857  | 3.44E-31  | 2.58E-29  |
| S100a10     | Up | 2.92167547 | 9.56E-41  | 1.04E-38  |
| Rgs6        | Up | 2.92274159 | 5.63E-36  | 5.07E-34  |
| Mmp17       | Up | 2.92365119 | 6.98E-40  | 7.29E-38  |
| Nin         | Up | 2.98709936 | 8.06E-47  | 1.08E-44  |
| Arhgap29    | Up | 3.01352341 | 8.51E-53  | 1.40E-50  |
| Ccdc109b    | Up | 3.05692316 | 3.01E-26  | 1.84E-24  |
| Osbpl3      | Up | 3.12305726 | 1.55E-61  | 3.41E-59  |
| Kirrel3     | Up | 3.21044241 | 8.36E-62  | 1.85E-59  |
| Jakmip1     | Up | 3.2677993  | 5.51E-139 | 5.76E-136 |
| Ntsr1       | Up | 3.29945476 | 4.00E-47  | 5.42E-45  |
| Rbfox1      | Up | 3.36541969 | 4.83E-142 | 6.12E-139 |
| Dlg2        | Up | 3.37875559 | 1.02E-88  | 3.94E-86  |
| Sybu        | Up | 3.44835696 | 1.22E-74  | 3.49E-72  |
| Hs3st3b1    | Up | 3.48023882 | 2.62E-26  | 1.61E-24  |
| Lmo3        | Up | 3.52488209 | 2.81E-97  | 1.35E-94  |
| Prkar1b     | Up | 3.53610627 | 6.40E-115 | 3.79E-112 |
| Accn1       | Up | 3.54228958 | 1.98E-38  | 1.94E-36  |
| Stom        | Up | 3.57579627 | 1.02E-100 | 5.35E-98  |
| Hs3st5      | Up | 3.67860887 | 2.07E-36  | 1.90E-34  |
| Cldn3       | Up | 3.95679326 | 3.81E-34  | 3.19E-32  |
| Gas7        | Up | 3.98683058 | 3.37E-224 | 1.50E-220 |
| Prickle1    | Up | 4.56221527 | 1.72E-93  | 7.09E-91  |
| Alcam       | Up | 4.86679503 | 1.30E-261 | 7.72E-258 |
| Mc4r        | Up | 5.63854695 | 2.17E-107 | 1.24E-104 |
