# Supplementary material
Source: PubMed Central journal article supplement (PMC8315738)
Supplement: mcb00526-20_supp_2_seq11.pdf [file mcb00526-20_supp_2_seq11.pdf]

**Supplementary Table 2**

| chr   | start     | end       | strand | gene    | bindingsiteseq | on_other_strand<br>of the gene |
|-------|-----------|-----------|--------|---------|----------------|--------------------------------|
| chr5  | 98032886  | 98032898  | -      | Antxr2  | TTTCCAGGTGTGA  | FALSE                          |
| chr5  | 98032645  | 98032657  | -      | Antxr2  | ACCCATCTGGAAC  | TRUE                           |
| chr5  | 98032886  | 98032898  | -      | Antxr2  | TTTCCAGGTGTGA  | FALSE                          |
| chr5  | 98032645  | 98032657  | -      | Antxr2  | ACCCATCTGGAAC  | TRUE                           |
| chr5  | 97995957  | 97995969  | -      | Antxr2  | CTTACAGCTGTTC  | FALSE                          |
| chr11 | 101553819 | 101553831 | -      | Brca1   | CAACCAGCTGTTC  | FALSE                          |
| chr11 | 101509714 | 101509726 | -      | Brca1   | CATCGACATGTTT  | FALSE                          |
| chr11 | 101508470 | 101508482 | -      | Brca1   | ATTACAGATGGTT  | FALSE                          |
| chr11 | 101522696 | 101522708 | -      | Brca1   | CAAAATCTGGGAT  | TRUE                           |
| chr11 | 101522327 | 101522339 | -      | Brca1   | AAGCATCTGGGTG  | TRUE                           |
| chr11 | 101553819 | 101553831 | -      | Brca1   | CAACCAGCTGTTC  | FALSE                          |
| chr11 | 101551639 | 101551651 | -      | Brca1   | GTCCCAGACGTTT  | FALSE                          |
| chr11 | 118427631 | 118427643 | +      | C1qtnf1 | CCTCCAGATGCTG  | FALSE                          |
| chr11 | 118428014 | 118428026 | +      | C1qtnf1 | CGTCCAGAAGTAG  | FALSE                          |
| chr11 | 118427938 | 118427950 | +      | C1qtnf1 | TCACATCTGGAAA  | TRUE                           |
| chr11 | 118428132 | 118428144 | +      | C1qtnf1 | TCACATCTGGCTG  | TRUE                           |
| chr11 | 118427631 | 118427643 | +      | C1qtnf1 | CCTCCAGATGCTG  | FALSE                          |
| chr11 | 118428014 | 118428026 | +      | C1qtnf1 | CGTCCAGAAGTAG  | FALSE                          |
| chr11 | 118427938 | 118427950 | +      | C1qtnf1 | TCACATCTGGAAA  | TRUE                           |
| chr11 | 118428132 | 118428144 | +      | C1qtnf1 | TCACATCTGGCTG  | TRUE                           |
| chr11 | 118433454 | 118433466 | +      | C1qtnf1 | GTTCCAGCTGTCA  | FALSE                          |
| chr11 | 118441657 | 118441669 | +      | C1qtnf1 | TATGCATATGTGT  | FALSE                          |
| chr11 | 118442258 | 118442270 | +      | C1qtnf1 | TGTTCCAGATGTGT | FALSE                          |
| chrX  | 143827872 | 143827884 | -      | Capn6   | TGGCCAAATGTTA  | FALSE                          |
| chrX  | 143827475 | 143827487 | -      | Capn6   | CTTCCAGATTTTC  | FALSE                          |
| chrX  | 143827494 | 143827506 | -      | Capn6   | GCACATCTGGCAG  | TRUE                           |
| chrX  | 143827872 | 143827884 | -      | Capn6   | TGGCCAAATGTTA  | FALSE                          |
| chrX  | 143827475 | 143827487 | -      | Capn6   | CTTCCAGATTTTC  | FALSE                          |
| chrX  | 143827494 | 143827506 | -      | Capn6   | GCACATCTGGCAG  | TRUE                           |
| chr8  | 83725825  | 83725837  | -      | Adgre5  | TAGCCAGGTGTGC  | FALSE                          |
| chr8  | 83726496  | 83726508  | -      | Adgre5  | CCATATCTGGGTC  | TRUE                           |
| chr8  | 83730252  | 83730264  | -      | Adgre5  | TTCCCAGATGTGA  | FALSE                          |
| chr8  | 83729520  | 83729532  | -      | Adgre5  | TCTGCAGATGTGG  | FALSE                          |
| chr8  | 83729411  | 83729423  | -      | Adgre5  | CAACTTCTGGGTC  | TRUE                           |
| chr8  | 83730252  | 83730264  | -      | Adgre5  | TTCCCAGATGTGA  | FALSE                          |
| chr8  | 83729520  | 83729532  | -      | Adgre5  | TCTGCAGATGTGG  | FALSE                          |
| chr8  | 83729411  | 83729423  | -      | Adgre5  | CAACTTCTGGGTC  | TRUE                           |
| chr18 | 59173441  | 59173453  | +      | Chsy3   | TAAGCAGATGTGG  | FALSE                          |
| chr9  | 65264268  | 65264280  | +      | Cilp    | CATACATATGTGT  | FALSE                          |
| chr9  | 65265070  | 65265082  | +      | Cilp    | TCAGATCTGGTTT  | TRUE                           |
| chr9  | 65264268  | 65264280  | +      | Cilp    | CATACATATGTGT  | FALSE                          |
| chr9  | 65265070  | 65265082  | +      | Cilp    | TCAGATCTGGTTT  | TRUE                           |
| chr9  | 65265717  | 65265729  | +      | Cilp    | AAACAACCTGGTAC | TRUE                           |

|       |           |             |         |                |       |
|-------|-----------|-------------|---------|----------------|-------|
| chr9  | 65266002  | 65266014 +  | Cilp    | ACTCATCTGGAGA  | TRUE  |
| chr8  | 11212216  | 11212228 -  | Col4a1  | AATTCAGATGGGG  | FALSE |
| chr8  | 11211676  | 11211688 -  | Col4a1  | TATTCAGATGCTG  | FALSE |
| chr8  | 11211203  | 11211215 -  | Col4a1  | TCTGCAGATGTCT  | FALSE |
| chr8  | 11218998  | 11219010 -  | Col4a1  | GAAGCAGATGTGG  | FALSE |
| chr8  | 11218800  | 11218812 -  | Col4a1  | TCCGCAGATGTTT  | FALSE |
| chr8  | 11242685  | 11242697 -  | Col4a1  | TACCCAGATATGG  | FALSE |
| chr8  | 11241849  | 11241861 -  | Col4a1  | GAGGCAGATGTAG  | FALSE |
| chr8  | 11241566  | 11241578 -  | Col4a1  | ATTCCAAATGTGC  | FALSE |
| chr8  | 11241556  | 11241568 -  | Col4a1  | TGCCCAGCTGTTA  | FALSE |
| chr8  | 11242857  | 11242869 -  | Col4a1  | TCACAGCTGGCTG  | TRUE  |
| chr8  | 11241785  | 11241797 -  | Col4a1  | GAACACCTGGTCC  | TRUE  |
| chr8  | 11280587  | 11280599 -  | Col4a1  | GAACAACCTGGGAA | TRUE  |
| chr8  | 11280283  | 11280295 -  | Col4a1  | ACACAACCTGTATA | TRUE  |
| chr2  | 27884571  | 27884583 +  | Col5a1  | AAGGCAGATGTTC  | FALSE |
| chr2  | 27885711  | 27885723 +  | Col5a1  | TTTCCAGCTGTCA  | FALSE |
| chr2  | 27884892  | 27884904 +  | Col5a1  | ACACATATGCATG  | TRUE  |
| chr2  | 28015457  | 28015469 +  | Col5a1  | GAGCCAGATGTGT  | FALSE |
| chr2  | 28016036  | 28016048 +  | Col5a1  | ACACAGCTGGATG  | TRUE  |
| chr2  | 28016312  | 28016324 +  | Col5a1  | CAGCACCTGGATC  | TRUE  |
| chr2  | 28016515  | 28016527 +  | Col5a1  | TAACATCTGTGAC  | TRUE  |
| chr2  | 28020546  | 28020558 +  | Col5a1  | TGTCCAAATGTCC  | FALSE |
| chr2  | 28020554  | 28020566 +  | Col5a1  | TGTCCAAATGTCC  | FALSE |
| chr2  | 27884571  | 27884583 +  | Col5a1  | AAGGCAGATGTTC  | FALSE |
| chr2  | 27885711  | 27885723 +  | Col5a1  | TTTCCAGCTGTCA  | FALSE |
| chr2  | 27884892  | 27884904 +  | Col5a1  | ACACATATGCATG  | TRUE  |
| chr2  | 28015457  | 28015469 +  | Col5a1  | GAGCCAGATGTGT  | FALSE |
| chr2  | 28016036  | 28016048 +  | Col5a1  | ACACAGCTGGATG  | TRUE  |
| chr2  | 28016312  | 28016324 +  | Col5a1  | CAGCACCTGGATC  | TRUE  |
| chr2  | 28016515  | 28016527 +  | Col5a1  | TAACATCTGTGAC  | TRUE  |
| chr2  | 28020546  | 28020558 +  | Col5a1  | TGTCCAAATGTCC  | FALSE |
| chr2  | 28020554  | 28020566 +  | Col5a1  | TGTCCAAATGTCC  | FALSE |
| chr3  | 137623923 | 137623935 + | Ddit4l  | TTCCCAGTTGTGC  | FALSE |
| chr1  | 184011474 | 184011486 + | Dusp10  | CAGCCAGTTGTGA  | FALSE |
| chr1  | 184033018 | 184033030 + | Dusp10  | GGACATCTGAACC  | TRUE  |
| chr14 | 54926859  | 54926871 -  | Efs     | AAGACAGATGTGG  | FALSE |
| chr14 | 54926859  | 54926871 -  | Efs     | AAGACAGATGTGG  | FALSE |
| chr14 | 54928095  | 54928107 -  | Efs     | GAACATCTGGTTT  | TRUE  |
| chr14 | 54926859  | 54926871 -  | Efs     | AAGACAGATGTGG  | FALSE |
| chr5  | 30913180  | 30913192 +  | Emilin1 | TATTCAGATTTGG  | FALSE |
| chr5  | 30913301  | 30913313 +  | Emilin1 | GAAGCAGATGTGG  | FALSE |
| chr5  | 30912459  | 30912471 +  | Emilin1 | CAACATCTCGTAG  | TRUE  |
| chr5  | 30913180  | 30913192 +  | Emilin1 | TATTCAGATTTGG  | FALSE |
| chr5  | 30913301  | 30913313 +  | Emilin1 | GAAGCAGATGTGG  | FALSE |
| chr5  | 30913836  | 30913848 +  | Emilin1 | GACCAAGATGTGC  | FALSE |
| chr5  | 30912459  | 30912471 +  | Emilin1 | CAACATCTCGTAG  | TRUE  |
| chr5  | 30919866  | 30919878 +  | Emilin1 | AGAGCAGATGTTG  | FALSE |

|       |           |           |   |         |                |       |
|-------|-----------|-----------|---|---------|----------------|-------|
| chr5  | 30919608  | 30919620  | + | Emilin1 | AACCATCTGTAAT  | TRUE  |
| chr1  | 14232356  | 14232368  | - | Eya1    | AAGCCAGATGAGT  | FALSE |
| chr1  | 14232565  | 14232577  | - | Eya1    | GGCCATCTGGACG  | TRUE  |
| chr1  | 14306594  | 14306606  | - | Eya1    | TCACATCTGTGTC  | TRUE  |
| chr1  | 14306594  | 14306606  | - | Eya1    | TCACATCTGTGTC  | TRUE  |
| chr3  | 52267763  | 52267775  | + | Foxo1   | CTTGCAGGTGTGC  | FALSE |
| chr3  | 52266723  | 52266735  | + | Foxo1   | TCACAGCTGGATT  | TRUE  |
| chr3  | 52266951  | 52266963  | + | Foxo1   | GCACCTCTGGTTC  | TRUE  |
| chr13 | 114460315 | 114460327 | - | Fst     | AAACAACCTGTCTT | TRUE  |
| chr13 | 114460315 | 114460327 | - | Fst     | AAACAACCTGTCTT | TRUE  |
| chr13 | 114460315 | 114460327 | - | Fst     | AAACAACCTGTCTT | TRUE  |
| chr10 | 56375783  | 56375795  | + | Gja1    | CTTCCAGAAGTCC  | FALSE |
| chr10 | 56375812  | 56375824  | + | Gja1    | CAACCACATGTTG  | FALSE |
| chr10 | 56375783  | 56375795  | + | Gja1    | CTTCCAGAAGTCC  | FALSE |
| chr10 | 56375812  | 56375824  | + | Gja1    | CAACCACATGTTG  | FALSE |
| chr10 | 56375783  | 56375795  | + | Gja1    | CTTCCAGAAGTCC  | FALSE |
| chr10 | 56375812  | 56375824  | + | Gja1    | CAACCACATGTTG  | FALSE |
| chr10 | 56375783  | 56375795  | + | Gja1    | CTTCCAGAAGTCC  | FALSE |
| chr10 | 56375812  | 56375824  | + | Gja1    | CAACCACATGTTG  | FALSE |
| chr10 | 56375783  | 56375795  | + | Gja1    | CTTCCAGAAGTCC  | FALSE |
| chr10 | 56375812  | 56375824  | + | Gja1    | CAACCACATGTTG  | FALSE |
| chr7  | 130935877 | 130935889 | + | Htra1   | ATTGCAGCTGTGG  | FALSE |
| chr7  | 130935491 | 130935503 | + | Htra1   | AAACATCTTGTTT  | TRUE  |
| chr7  | 130935877 | 130935889 | + | Htra1   | ATTGCAGCTGTGG  | FALSE |
| chr7  | 130935491 | 130935503 | + | Htra1   | AAACATCTTGTTT  | TRUE  |
| chr7  | 130980372 | 130980384 | + | Htra1   | CTCACAGATGTCT  | FALSE |
| chr7  | 130981172 | 130981184 | + | Htra1   | CTACAGCTGGCTG  | TRUE  |
| chr7  | 130981542 | 130981554 | + | Htra1   | CCACACCTGGCAA  | TRUE  |
| chr7  | 130981172 | 130981184 | + | Htra1   | CTACAGCTGGCTG  | TRUE  |
| chr7  | 130981542 | 130981554 | + | Htra1   | CCACACCTGGCAA  | TRUE  |
| chr7  | 130982045 | 130982057 | + | Htra1   | GTAGATCTGGAAC  | TRUE  |
| chr7  | 130982287 | 130982299 | + | Htra1   | TCACATCTAGGTG  | TRUE  |
| chr9  | 65100299  | 65100311  | + | Igdcc4  | ATTACAGATGGTT  | FALSE |
| chr9  | 65099631  | 65099643  | + | Igdcc4  | GAAGATCAGGATG  | TRUE  |
| chr9  | 65100299  | 65100311  | + | Igdcc4  | ATTACAGATGGTT  | FALSE |
| chr9  | 65099631  | 65099643  | + | Igdcc4  | GAAGATCAGGATG  | TRUE  |
| chr9  | 65100299  | 65100311  | + | Igdcc4  | ATTACAGATGGTT  | FALSE |
| chr9  | 65099631  | 65099643  | + | Igdcc4  | GAAGATCAGGATG  | TRUE  |
| chr9  | 65100299  | 65100311  | + | Igdcc4  | ATTACAGATGGTT  | FALSE |
| chr9  | 65099631  | 65099643  | + | Igdcc4  | GAAGATCAGGATG  | TRUE  |
| chr9  | 65100299  | 65100311  | + | Igdcc4  | ATTACAGATGGTT  | FALSE |
| chr9  | 65099631  | 65099643  | + | Igdcc4  | GAAGATCAGGATG  | TRUE  |
| chr9  | 65100299  | 65100311  | + | Igdcc4  | ATTACAGATGGTT  | FALSE |
| chr9  | 65099631  | 65099643  | + | Igdcc4  | GAAGATCAGGATG  | TRUE  |
| chr9  | 65100299  | 65100311  | + | Igdcc4  | ATTACAGATGGTT  | FALSE |
| chr9  | 65099631  | 65099643  | + | Igdcc4  | GAAGATCAGGATG  | TRUE  |
| chr11 | 7215637   | 7215649   | - | Igfbp3  | CCACATCTAGAAT  | TRUE  |

|       |           |             |        |                |       |
|-------|-----------|-------------|--------|----------------|-------|
| chr11 | 7215471   | 7215483 -   | Igfbp3 | GAACAACCTGGGAC | TRUE  |
| chr11 | 7215637   | 7215649 -   | Igfbp3 | CCACATCTAGAAT  | TRUE  |
| chr11 | 7215471   | 7215483 -   | Igfbp3 | GAACAACCTGGGAC | TRUE  |
| chr11 | 99041068  | 99041080 +  | Igfbp4 | CTTTCAGATGTTG  | FALSE |
| chr11 | 99040565  | 99040577 +  | Igfbp4 | CAACATCTAGGAA  | TRUE  |
| chr11 | 99041068  | 99041080 +  | Igfbp4 | CTTTCAGATGTTG  | FALSE |
| chr11 | 99040565  | 99040577 +  | Igfbp4 | CAACATCTAGGAA  | TRUE  |
| chr11 | 99041068  | 99041080 +  | Igfbp4 | CTTTCAGATGTTG  | FALSE |
| chr11 | 99042239  | 99042251 +  | Igfbp4 | CATGCACATGTGC  | FALSE |
| chr11 | 99040565  | 99040577 +  | Igfbp4 | CAACATCTAGGAA  | TRUE  |
| chr11 | 99042242  | 99042254 +  | Igfbp4 | GCACATGTGCATA  | TRUE  |
| chr11 | 99042239  | 99042251 +  | Igfbp4 | CATGCACATGTGC  | FALSE |
| chr11 | 99042800  | 99042812 +  | Igfbp4 | CAGACAGATCTTG  | FALSE |
| chr11 | 99042242  | 99042254 +  | Igfbp4 | GCACATGTGCATA  | TRUE  |
| chr11 | 99042800  | 99042812 +  | Igfbp4 | CAGACAGATCTTG  | FALSE |
| chr11 | 99043910  | 99043922 +  | Igfbp4 | ACACAACCTGTCTG | TRUE  |
| chr11 | 99046157  | 99046169 +  | Igfbp4 | TATTCAGTTGTTC  | FALSE |
| chr11 | 99046428  | 99046440 +  | Igfbp4 | GAGCCAGATGTGG  | FALSE |
| chr11 | 99047226  | 99047238 +  | Igfbp4 | AAACCAGATGTAA  | FALSE |
| chr11 | 99045825  | 99045837 +  | Igfbp4 | GCACACCTGGATG  | TRUE  |
| chr11 | 99047255  | 99047267 +  | Igfbp4 | CAACATCTGGAAT  | TRUE  |
| chr9  | 21799782  | 21799794 -  | Kank2  | ACACATGTGGAGT  | TRUE  |
| chr9  | 21799782  | 21799794 -  | Kank2  | ACACATGTGGAGT  | TRUE  |
| chr9  | 21798334  | 21798346 -  | Kank2  | TAACATCTGCGCC  | TRUE  |
| chr9  | 21799782  | 21799794 -  | Kank2  | ACACATGTGGAGT  | TRUE  |
| chr9  | 21798334  | 21798346 -  | Kank2  | TAACATCTGCGCC  | TRUE  |
| chrX  | 100632435 | 100632447 + | Kif4   | GCTCCAGTTGTTT  | FALSE |
| chrX  | 100632473 | 100632485 + | Kif4   | GCACATCTGCTAC  | TRUE  |
| chrX  | 100711341 | 100711353 + | Kif4   | AGTGCAGATGTTT  | FALSE |
| chrX  | 100712224 | 100712236 + | Kif4   | AATCCAGTTTTTC  | FALSE |
| chrX  | 100711845 | 100711857 + | Kif4   | CGACATCTGAATG  | TRUE  |
| chr1  | 153186248 | 153186260 - | Lamc2  | GGGCCAGGTGTGC  | FALSE |
| chr1  | 153186248 | 153186260 - | Lamc2  | GGGCCAGGTGTGC  | FALSE |
| chr1  | 153127254 | 153127266 - | Lamc2  | GGCACAGATGTTT  | FALSE |
| chr1  | 153128257 | 153128269 - | Lamc2  | TTACATCTGCAAC  | TRUE  |
| chr1  | 153153669 | 153153681 - | Lamc2  | ACACATCTGCCTG  | TRUE  |
| chr1  | 153153271 | 153153283 - | Lamc2  | GAACATCTGATCC  | TRUE  |
| chr1  | 153152145 | 153152157 - | Lamc2  | TATCATCTGGACC  | TRUE  |
| chr1  | 153186248 | 153186260 - | Lamc2  | GGGCCAGGTGTGC  | FALSE |
| chr6  | 17462644  | 17462656 +  | Met    | ATACCAGCTGTGT  | FALSE |
| chr6  | 17462644  | 17462656 +  | Met    | ATACCAGCTGTGT  | FALSE |
| chr6  | 17462644  | 17462656 +  | Met    | ATACCAGCTGTGT  | FALSE |
| chr6  | 17464041  | 17464053 +  | Met    | GAGCCAGATGCTG  | FALSE |
| chr6  | 17462644  | 17462656 +  | Met    | ATACCAGCTGTGT  | FALSE |
| chr6  | 17464041  | 17464053 +  | Met    | GAGCCAGATGCTG  | FALSE |
| chr6  | 17489531  | 17489543 +  | Met    | TAGCCAGATGTCA  | FALSE |
| chr6  | 17489838  | 17489850 +  | Met    | CAGACAGATGTGC  | FALSE |

|       |          |          |   |       |                |       |
|-------|----------|----------|---|-------|----------------|-------|
| chr6  | 17490283 | 17490295 | + | Met   | AATTCACATGTTT  | FALSE |
| chr6  | 17489419 | 17489431 | + | Met   | TAAAATCTGTATC  | TRUE  |
| chr6  | 17534340 | 17534352 | + | Met   | AATATAGATGTTT  | FALSE |
| chr6  | 17534839 | 17534851 | + | Met   | CTTACAGATGTAA  | FALSE |
| chr6  | 17534802 | 17534814 | + | Met   | CCACCTCTGGAAA  | TRUE  |
| chr6  | 17545924 | 17545936 | + | Met   | TATAAAGATGTGC  | FALSE |
| chr14 | 54429896 | 54429908 | + | Mmp14 | CAGCCAGATCTTG  | FALSE |
| chr14 | 54430427 | 54430439 | + | Mmp14 | GTTCCAGAGGTTA  | FALSE |
| chr14 | 54429896 | 54429908 | + | Mmp14 | CAGCCAGATCTTG  | FALSE |
| chr14 | 54430427 | 54430439 | + | Mmp14 | GTTCCAGAGGTTA  | FALSE |
| chr14 | 54429896 | 54429908 | + | Mmp14 | CAGCCAGATCTTG  | FALSE |
| chr14 | 54430427 | 54430439 | + | Mmp14 | GTTCCAGAGGTTA  | FALSE |
| chr14 | 54429896 | 54429908 | + | Mmp14 | CAGCCAGATCTTG  | FALSE |
| chr14 | 54430427 | 54430439 | + | Mmp14 | GTTCCAGAGGTTA  | FALSE |
| chr14 | 54436601 | 54436613 | + | Mmp14 | TCACGTCTGGATG  | TRUE  |
| chr14 | 54438764 | 54438776 | + | Mmp14 | CAACATCTGTGAC  | TRUE  |
| chr8  | 92827139 | 92827151 | + | Mmp2  | GGTGCAGATGTGG  | FALSE |
| chr8  | 92827409 | 92827421 | + | Mmp2  | CATCCAGGAGTTT  | FALSE |
| chr8  | 92827338 | 92827350 | + | Mmp2  | CCACATCTGGCGT  | TRUE  |
| chr8  | 92841862 | 92841874 | + | Mmp2  | GTTCTGATGTAT   | FALSE |
| chr8  | 92842235 | 92842247 | + | Mmp2  | CTGCCAGATGTGG  | FALSE |
| chr8  | 92842900 | 92842912 | + | Mmp2  | TCTGCAGATGTCA  | FALSE |
| chr8  | 92842235 | 92842247 | + | Mmp2  | CTGCCAGATGTGG  | FALSE |
| chr8  | 92842900 | 92842912 | + | Mmp2  | TCTGCAGATGTCA  | FALSE |
| chr15 | 25620692 | 25620704 | + | Myo10 | GCACATCTGTTTT  | TRUE  |
| chr15 | 25621274 | 25621286 | + | Myo10 | CAACATCTGGAAA  | TRUE  |
| chr15 | 25620692 | 25620704 | + | Myo10 | GCACATCTGTTTT  | TRUE  |
| chr15 | 25621274 | 25621286 | + | Myo10 | CAACATCTGGAAA  | TRUE  |
| chr15 | 25620692 | 25620704 | + | Myo10 | GCACATCTGTTTT  | TRUE  |
| chr15 | 25621274 | 25621286 | + | Myo10 | CAACATCTGGAAA  | TRUE  |
| chr15 | 25672913 | 25672925 | + | Myo10 | GGACCTCTGGAAG  | TRUE  |
| chr15 | 25673430 | 25673442 | + | Myo10 | TGACATCTGGGAC  | TRUE  |
| chr15 | 25712506 | 25712518 | + | Myo10 | TGTACAGATGTTC  | FALSE |
| chr15 | 25712883 | 25712895 | + | Myo10 | TGTCCAGCTGTCC  | FALSE |
| chr15 | 25713168 | 25713180 | + | Myo10 | GATGCAGAAGTGC  | FALSE |
| chr15 | 25741349 | 25741361 | + | Myo10 | GTTACAGATGGTT  | FALSE |
| chr15 | 25740923 | 25740935 | + | Myo10 | CCACATCTTCATT  | TRUE  |
| chr15 | 25751213 | 25751225 | + | Myo10 | TGTACAGATGTAA  | FALSE |
| chr15 | 25751213 | 25751225 | + | Myo10 | TGTACAGATGTAA  | FALSE |
| chr15 | 25756812 | 25756824 | + | Myo10 | CATCCAGATATGG  | FALSE |
| chr15 | 25757303 | 25757315 | + | Myo10 | CATCCAGGTTTTTC | FALSE |
| chr15 | 25757548 | 25757560 | + | Myo10 | CTTCCAGATGTGC  | FALSE |
| chr15 | 25758118 | 25758130 | + | Myo10 | GTGCCAGATGCTG  | FALSE |
| chr15 | 25756812 | 25756824 | + | Myo10 | CATCCAGATATGG  | FALSE |
| chr15 | 25757303 | 25757315 | + | Myo10 | CATCCAGGTTTTTC | FALSE |
| chr15 | 25757548 | 25757560 | + | Myo10 | CTTCCAGATGTGC  | FALSE |
| chr15 | 25758118 | 25758130 | + | Myo10 | GTGCCAGATGCTG  | FALSE |

|       |          |            |          |               |       |
|-------|----------|------------|----------|---------------|-------|
| chr15 | 25767453 | 25767465 + | Myo10    | TAAATCTGGCAA  | TRUE  |
| chr15 | 25773850 | 25773862 + | Myo10    | CCTCCAGCTGTGA | FALSE |
| chr15 | 25779732 | 25779744 + | Myo10    | CAGGCAGCTGTTG | FALSE |
| chr15 | 25780084 | 25780096 + | Myo10    | ATTACAGGTGTGT | FALSE |
| chr15 | 25778550 | 25778562 + | Myo10    | CAAGATCTGAATT | TRUE  |
| chr15 | 25778865 | 25778877 + | Myo10    | GAACATTTGTAAG | TRUE  |
| chr6  | 5299875  | 5299887 -  | Pon2     | GTCACAGATGTGT | FALSE |
| chr6  | 5299768  | 5299780 -  | Pon2     | TGGCCTGATGTGC | FALSE |
| chr6  | 5299266  | 5299278 -  | Pon2     | CCACACCTGGCTA | TRUE  |
| chr6  | 5299875  | 5299887 -  | Pon2     | GTCACAGATGTGT | FALSE |
| chr6  | 5299768  | 5299780 -  | Pon2     | TGGCCTGATGTGC | FALSE |
| chr6  | 5299266  | 5299278 -  | Pon2     | CCACACCTGGCTA | TRUE  |
| chr6  | 5290483  | 5290495 -  | Pon2     | CGTCCAGCTGTTA | FALSE |
| chr13 | 92609287 | 92609299 + | Serinc5  | ATGCCACATGTTT | FALSE |
| chr13 | 92609287 | 92609299 + | Serinc5  | ATGCCACATGTTT | FALSE |
| chr7  | 99353179 | 99353191 - | Serpinh1 | TTTCCAGAAGTTT | FALSE |
| chr7  | 99353179 | 99353191 - | Serpinh1 | TTTCCAGAAGTTT | FALSE |
| chr7  | 99353179 | 99353191 - | Serpinh1 | TTTCCAGAAGTTT | FALSE |
| chr7  | 99353179 | 99353191 - | Serpinh1 | TTTCCAGAAGTTT | FALSE |
| chr7  | 99353179 | 99353191 - | Serpinh1 | TTTCCAGAAGTTT | FALSE |
| chr7  | 99353179 | 99353191 - | Serpinh1 | TTTCCAGAAGTTT | FALSE |
| chr7  | 99353179 | 99353191 - | Serpinh1 | TTTCCAGAAGTTT | FALSE |
| chr7  | 99353179 | 99353191 - | Serpinh1 | TTTCCAGAAGTTT | FALSE |
| chr7  | 99353179 | 99353191 - | Serpinh1 | TTTCCAGAAGTTT | FALSE |
| chr7  | 99353179 | 99353191 - | Serpinh1 | TTTCCAGAAGTTT | FALSE |
| chr7  | 99353179 | 99353191 - | Serpinh1 | TTTCCAGAAGTTT | FALSE |
| chr7  | 99353179 | 99353191 - | Serpinh1 | TTTCCAGAAGTTT | FALSE |
| chr7  | 99353179 | 99353191 - | Serpinh1 | TTTCCAGAAGTTT | FALSE |
| chr7  | 99353179 | 99353191 - | Serpinh1 | TTTCCAGAAGTTT | FALSE |
| chr7  | 99353179 | 99353191 - | Serpinh1 | TTTCCAGAAGTTT | FALSE |
| chr7  | 99353179 | 99353191 - | Serpinh1 | TTTCCAGAAGTTT | FALSE |
| chr17 | 85690151 | 85690163 - | Six2     | TGACATCTGGATT | TRUE  |
| chr17 | 85690151 | 85690163 - | Six2     | TGACATCTGGATT | TRUE  |
| chr5  | 88885787 | 88885799 + | Slc4a4   | CAACCTCTGTATC | TRUE  |
| chr5  | 88885787 | 88885799 + | Slc4a4   | CAACCTCTGTATC | TRUE  |
| chr5  | 88885787 | 88885799 + | Slc4a4   | CAACCTCTGTATC | TRUE  |
| chr5  | 88885787 | 88885799 + | Slc4a4   | CAACCTCTGTATC | TRUE  |
| chr5  | 88933577 | 88933589 + | Slc4a4   | TAACCAGATGTCT | FALSE |
| chr5  | 88932535 | 88932547 + | Slc4a4   | TAACAGCTGTATT | TRUE  |
| chr5  | 88933602 | 88933614 + | Slc4a4   | GAACATGTGGGTC | TRUE  |
| chr5  | 88933577 | 88933589 + | Slc4a4   | TAACCAGATGTCT | FALSE |
| chr5  | 88933602 | 88933614 + | Slc4a4   | GAACATGTGGGTC | TRUE  |
| chr5  | 89026659 | 89026671 + | Slc4a4   | GTTACAGATGATG | FALSE |
| chr5  | 89026831 | 89026843 + | Slc4a4   | CTACATCTGAGTC | TRUE  |
| chr5  | 89027133 | 89027145 + | Slc4a4   | CAACATCTGGAGA | TRUE  |
| chr5  | 89026659 | 89026671 + | Slc4a4   | GTTACAGATGATG | FALSE |
| chr5  | 89026831 | 89026843 + | Slc4a4   | CTACATCTGAGTC | TRUE  |
| chr5  | 89027133 | 89027145 + | Slc4a4   | CAACATCTGGAGA | TRUE  |
| chr5  | 89026659 | 89026671 + | Slc4a4   | GTTACAGATGATG | FALSE |

|       |           |           |   |        |               |       |
|-------|-----------|-----------|---|--------|---------------|-------|
| chr5  | 89026831  | 89026843  | + | Slc4a4 | CTACATCTGAGTC | TRUE  |
| chr5  | 89027133  | 89027145  | + | Slc4a4 | CAACATCTGGAGA | TRUE  |
| chr16 | 14705571  | 14705583  | + | Snai2  | CCACATCTGGAAG | TRUE  |
| chr14 | 69028272  | 69028284  | + | Stc1   | GTGACAGATGTCT | FALSE |
| chr14 | 69029137  | 69029149  | + | Stc1   | AAGCCAGAGGTGC | FALSE |
| chr9  | 116177030 | 116177042 | - | Tgfb2  | CACTCAGATGTGC | FALSE |
| chr9  | 116175339 | 116175351 | - | Tgfb2  | TGCCCAGCTGTTG | FALSE |
| chr9  | 116175827 | 116175839 | - | Tgfb2  | AAACTCCTGGATT | TRUE  |
| chr9  | 116175138 | 116175150 | - | Tgfb2  | CCACATCTGGCCC | TRUE  |
| chr9  | 116177030 | 116177042 | - | Tgfb2  | CACTCAGATGTGC | FALSE |
| chr9  | 116175339 | 116175351 | - | Tgfb2  | TGCCCAGCTGTTG | FALSE |
| chr9  | 116175827 | 116175839 | - | Tgfb2  | AAACTCCTGGATT | TRUE  |
| chr6  | 53822534  | 53822546  | - | Tril   | GGTCCAGAGGTGA | FALSE |
| chr6  | 53820969  | 53820981  | - | Tril   | CGTACAGCTGTTT | FALSE |
| chr6  | 53821136  | 53821148  | - | Tril   | CAACATCTTGCG  | TRUE  |
| chr6  | 42352650  | 42352662  | + | Zyx    | AGTACAGTTGTTG | FALSE |
| chr6  | 42352660  | 42352672  | + | Zyx    | TTGCCAGTTGTTA | FALSE |
| chr6  | 42353191  | 42353203  | + | Zyx    | GATGCAGATGAGT | FALSE |
| chr6  | 42353191  | 42353203  | + | Zyx    | GATGCAGATGAGT | FALSE |
| chr6  | 42353849  | 42353861  | + | Zyx    | CAACATTTGGCG  | TRUE  |
